# Supplementary material for: Copper-catalyzed enantioselective propargylic substitution of propargylic acetates with enamines
Source: Royal Society of Chemistry journal article supplement (doi:10.1039/c4ra09431j), 2014-01-01
Supplement: c4ra09431j1.pdf [file c4ra09431j1.pdf]

## Electronic Supplementary Information

# Copper-Catalyzed Enantioselective Propargylic Substitution of Propargylic Acetates with Enamines

Bo Wang,<sup>a,b</sup> Chunxiao Liu,<sup>a</sup> and Hongchao Guo\*<sup>b</sup>

<sup>a</sup> State Key Laboratory Breeding Base of Green Pesticide and Agricultural Bioengineering, Key Laboratory of Green Pesticide and Agricultural Bioengineering, Ministry of Education, Guizhou University, Huaxi District, Guiyang 550025 (China)

<sup>b</sup> Department of Applied Chemistry, China Agricultural University, Beijing 100193, China.

Email: hchguo@cau.edu.cn

## Contents

|                                                                         |         |
|-------------------------------------------------------------------------|---------|
| General Information                                                     | S2      |
| General Procedure for Cu-Catalyzed Propargylic Substitution             | S2      |
| Analytic and Characterization Data of the Products <b>3</b>             | S2–S10  |
| <sup>1</sup> H and <sup>13</sup> C NMR Spectra of the Products <b>3</b> | S11–S27 |
| HPLC Chromatogram of Racemic and Chiral Products <b>3</b>               | S28–S44 |

### General information

All reactions were performed under an argon atmosphere in oven-dried glassware with magnetic stirring. Unless otherwise stated, all reagents were purchased from commercial suppliers and used without further purification. Methanol and other solvents employed in the reactions were dried under N<sub>2</sub> atmosphere using the standard procedure. Flash column chromatography was performed using Qingdao Haiyang flash silica gel (200–300 mesh). <sup>1</sup>H and <sup>13</sup>C NMR spectra were recorded in CDCl<sub>3</sub> using a 400 MHz NMR instrument (referenced internally to Me<sub>4</sub>Si).

### General Procedure for Cu-Catalyzed Propargylic Substitution of Propargylic Acetates with Enamines

Under an argon atmosphere, Cu(CH<sub>3</sub>CN)<sub>4</sub>ClO<sub>4</sub> (8.3 mg, 0.025 mmol) and chiral tridentate P,N,N ligand (18.8 mg, 0.038 mmol) were dissolved in 2 mL of MeOH. The resulting mixture was stirred at room temperature for 1 h, and then was cooled to 0 °C. Enamine **2** (1.0 mmol), propargylic acetate **1** (0.5 mmol), 2 mL of MeOH and *i*-Pr<sub>2</sub>NEt (200 μL, 1.2 mmol) were added sequentially. The reaction mixture was stirred at 0 °C for 12 h, and then was concentrated in vacuo. The residue was purified through flash column chromatography (EtOAc/petroleum ether = 1/40) to afford the corresponding propargylic ketone.

### (*S*)-1,3-Diphenylpent-4-yn-1-one (**3aa**)

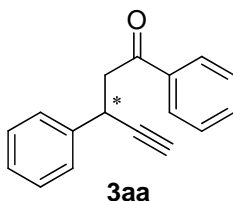

White solid, 90% yield. mp 78–79 °C.  $[\alpha]_D^{20} = 2.4$  ( $c = 1.00$ , CH<sub>2</sub>Cl<sub>2</sub>). <sup>1</sup>H NMR (400 MHz, CDCl<sub>3</sub>) δ 7.97 (d,  $J = 7.3$  Hz, 2H), 7.58 (d,  $J = 7.2$  Hz, 1H), 7.49–7.46 (m, 4H), 7.36 (d,  $J = 7.2$  Hz, 2H), 7.29 (d,  $J = 7.1$  Hz, 1H), 4.48 (s, 1H), 3.66–3.60 (m, 1H), 3.41–3.36 (m, 1H), 2.29 (s, 1H). <sup>13</sup>C NMR (101 MHz, CDCl<sub>3</sub>) δ 196.7, 140.6, 136.6, 133.3, 128.7, 128.6, 128.1, 127.5, 127.2, 85.3, 71.0, 47.1, 32.6. HPLC analysis: 97% ee, chiralcel OJ-H column, *n*-hexane/*i*-propanol = 95/5, flow rate = 0.8 mL/min, 40 °C, 230 nm,  $t_R$ : 25.2 min (major), 33.9 min (minor).

**(S)-1-Phenyl-3-*p*-tolylpent-4-yn-1-one (3ba)**

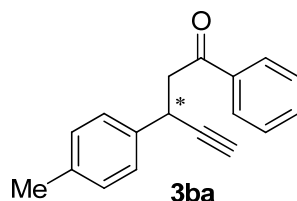

White solid, 92% yield. mp 76–78 °C.  $[\alpha]_D^{20} = 8.1$  ( $c = 1.00$ ,  $\text{CH}_2\text{Cl}_2$ ).  $^1\text{H}$  NMR (400 MHz,  $\text{CDCl}_3$ )  $\delta$  7.98 (d,  $J = 7.3$  Hz, 2H), 7.57 (d,  $J = 7.2$  Hz, 1H), 7.47 (t,  $J = 7.4$  Hz, 2H), 7.40 (d,  $J = 7.6$  Hz, 2H), 7.19 (d,  $J = 7.4$  Hz, 2H), 4.46 (s, 1H), 3.62 (dd,  $J = 17.1, 8.0$  Hz, 1H), 3.38 (dd,  $J = 17.1, 5.8$  Hz, 1H), 2.37 (s, 3H), 2.30 (s, 1H).  $^{13}\text{C}$  NMR (101 MHz,  $\text{CDCl}_3$ )  $\delta$  196.8, 137.7, 136.8, 136.7, 133.3, 129.4, 128.6, 128.2, 127.4, 85.6, 70.9, 47.1, 32.3, 21.1. HPLC analysis: 97% ee, chiralcel OJ-H column, *n*-hexane/*i*-propanol = 90/10, flow rate = 1.0 mL/min, 40 °C, 230 nm,  $t_R$ : 13.5 min (major), 15.7 min (minor).

**(S)-3-(4-Methoxyphenyl)-1-phenylpent-4-yn-1-one (3ca)**

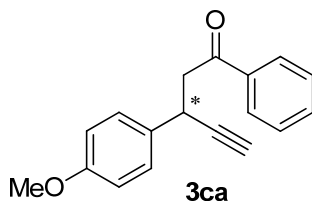

White solid, 95% yield. mp 63–65 °C.  $[\alpha]_D^{20} = 1.9$  ( $c = 1.10$ ,  $\text{CH}_2\text{Cl}_2$ ).  $^1\text{H}$  NMR (400 MHz,  $\text{CDCl}_3$ )  $\delta$  7.97–7.95 (m, 2H), 7.60–7.55 (m, 1H), 7.49–7.45 (m, 2H), 7.42–7.39 (m, 2H), 6.92–6.88 (m, 2H), 4.45–4.41 (m, 1H), 3.80 (s, 3H), 3.59 (dd,  $J = 17.1, 7.9$  Hz, 1H), 3.37 (dd,  $J = 17.1, 6.2$  Hz, 1H), 2.29 (d,  $J = 2.5$  Hz, 1H).  $^{13}\text{C}$  NMR (101 MHz,  $\text{CDCl}_3$ )  $\delta$  196.9, 158.7, 136.7, 133.3, 132.6, 128.6, 128.5, 128.1, 114.1, 85.7, 70.8, 55.3, 47.1, 31.9. HPLC analysis: 95% ee, chiralcel OD-H column, *n*-hexane/*i*-propanol = 98/2, flow rate = 0.6 mL/min, 40 °C, 230 nm,  $t_R$ : 20.5 min (major), 23.1 min (minor).

**(S)-3-(4-Fluorophenyl)-1-phenylpent-4-yn-1-one (3da)**

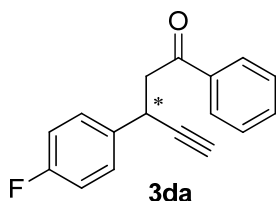

White solid, 86% yield. mp 60–61 °C.  $[\alpha]_D^{20} = -3.1$  ( $c = 1.05$ ,  $\text{CH}_2\text{Cl}_2$ ).  $^1\text{H}$  NMR (400 MHz,  $\text{CDCl}_3$ )  $\delta$  7.94 (d,  $J = 7.5$  Hz, 2H), 7.57 (t,  $J = 7.4$  Hz, 1H), 7.47–7.43 (m, 4H), 7.02 (t,  $J = 8.6$  Hz, 2H), 4.47–4.43 (m, 1H), 3.58 (dd,  $J = 17.2$ , 7.5 Hz, 1H), 3.36 (dd,  $J = 17.2$ , 6.4 Hz, 1H), 2.30 (d,  $J = 2.4$  Hz, 1H).  $^{13}\text{C}$  NMR (101 MHz,  $\text{CDCl}_3$ )  $\delta$  196.5, 161.9 ( $J = 245.5$  Hz), 136.5, 136.4, 136.3, 133.4, 129.1 ( $J = 8.1$  Hz), 128.6, 128.1, 115.47 ( $J = 21.4$  Hz), 85.2, 71.2, 47.0, 31.9. HPLC analysis: 96% ee, chiralcel OJ-H column, *n*-hexane/*i*-propanol = 85/15, flow rate = 1.0 mL/min, 40 °C, 230 nm,  $t_R$ : 10.0 min (major), 12.7 min (minor).

**(S)-3-(2-Chlorophenyl)-1-phenylpent-4-yn-1-one (3ea)**

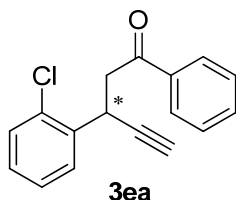

Colorless oil, 75% yield.  $[\alpha]_D^{20} = 36.1$  ( $c = 1.06$ ,  $\text{CH}_2\text{Cl}_2$ ).  $^1\text{H}$  NMR (400 MHz,  $\text{CDCl}_3$ )  $\delta$  8.00–7.98 (m, 2H), 7.79 (dd,  $J = 7.7$ , 1.6 Hz, 1H), 7.61–7.57 (m, 1H), 7.48 (t,  $J = 7.7$  Hz, 2H), 7.40 (dd,  $J = 7.9$ , 1.2 Hz, 1H), 7.33 (td,  $J = 7.6$ , 1.2 Hz, 1H), 7.28–7.23 (m, 1H), 4.90–4.86 (m, 1H), 3.51 (dd,  $J = 17.0$ , 9.6 Hz, 1H), 3.40 (dd,  $J = 17.0$ , 4.3 Hz, 1H), 2.31 (d,  $J = 2.5$  Hz, 1H).  $^{13}\text{C}$  NMR (101 MHz,  $\text{CDCl}_3$ )  $\delta$  196.3, 137.7, 136.5, 133.3, 132.7, 129.7, 129.4, 128.6, 128.6, 128.1, 127.3, 84.0, 71.7, 45.1, 30.3. HPLC analysis: 97% ee, chiralcel OJ-H column, *n*-hexane/*i*-propanol = 85/15, flow rate = 0.8 mL/min, 40 °C, 230 nm,  $t_R$ : 12.9 min (major), 15.3min (minor).

**(S)-3-(3-Chlorophenyl)-1-phenylpent-4-yn-1-one (3fa)**

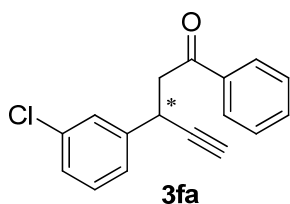

Colorless oil, 88% yield.  $[\alpha]_D^{20} = 0.8$  ( $c = 1.00$ ,  $\text{CH}_2\text{Cl}_2$ ).  $^1\text{H}$  NMR (400 MHz,  $\text{CDCl}_3$ )  $\delta$  7.95–7.93 (m, 2H), 7.57 (t,  $J = 7.4$  Hz, 1H), 7.50–7.44 (m, 3H), 7.36–7.34 (m, 1H), 7.29–7.22 (m, 2H), 4.47–4.43 (m, 1H), 3.60 (dd,  $J = 17.3, 7.8$  Hz, 1H), 3.36 (dd,  $J = 17.3, 6.1$  Hz, 1H), 2.31 (d,  $J = 2.5$  Hz, 1H).  $^{13}\text{C}$  NMR (101 MHz,  $\text{CDCl}_3$ )  $\delta$  196.3, 142.6, 136.4, 134.5, 133.4, 129.9, 128.7, 128.1, 127.7, 127.4, 125.8, 84.6, 71.6, 46.8, 32.2. HPLC analysis: 98% ee, chiralcel OJ-H column, *n*-hexane/*i*-propanol = 85/15, flow rate = 1.0 mL/min, 40 °C, 230 nm,  $t_R$ : 9.9 min (major), 11.5 min (minor).

**(S)-3-(4-Chlorophenyl)-1-phenylpent-4-yn-1-one (3ga).**

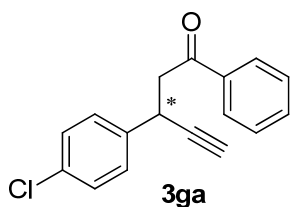

White solid, 95% yield. mp 79–81 °C.  $[\alpha]_D^{20} = 5.8$  ( $c = 1.00$ ,  $\text{CH}_2\text{Cl}_2$ ).  $^1\text{H}$  NMR (400 MHz,  $\text{CDCl}_3$ )  $\delta$  7.95–7.93 (m, 2H), 7.57 (t,  $J = 7.4$  Hz, 1H), 7.48–7.40 (m, 4H), 7.34–7.30 (m, 2H), 4.47–4.43 (m, 1H), 3.59 (dd,  $J = 17.2, 7.5$  Hz, 1H), 3.36 (dd,  $J = 17.2, 6.4$  Hz, 1H), 2.30 (d,  $J = 2.5$  Hz, 1H).  $^{13}\text{C}$  NMR (101 MHz,  $\text{CDCl}_3$ )  $\delta$  196.4, 139.1, 136.5, 133.4, 132.9, 129.0, 128.8, 128.7, 128.1, 84.9, 71.4, 46.8, 32.0. HPLC analysis: 97% ee, chiralcel OJ-H column, *n*-hexane/*i*-propanol = 85/15, flow rate = 0.8 mL/min, 40 °C, 214 nm,  $t_R$ : 9.6 min (major), 11.5 min (minor).

**(S)-3-(4-Bromophenyl)-1-phenylpent-4-yn-1-one (3ha)**

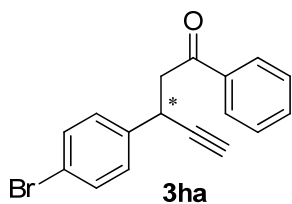

White solid, 83% yield. mp 80–82 °C.  $[\alpha]_D^{20} = 8.5$  ( $c = 1.10$ ,  $\text{CH}_2\text{Cl}_2$ ).  $^1\text{H}$  NMR (400 MHz,  $\text{CDCl}_3$ )  $\delta$  7.94–7.92 (m, 2H), 7.57 (t,  $J = 7.4$  Hz, 1H), 7.47–7.44 (m, 4H), 7.37–7.27 (m, 2H), 4.45–4.41 (m, 1H), 3.58 (dd,  $J = 17.2, 7.5$  Hz, 1H), 3.36 (dd,  $J = 17.2, 6.4$  Hz, 1H), 2.30 (d,  $J = 2.5$  Hz, 1H).  $^{13}\text{C}$  NMR (101 MHz,  $\text{CDCl}_3$ )  $\delta$  196.3, 139.7, 136.4, 133.4, 131.7, 129.3, 128.7, 128.1, 121.0, 84.8, 71.4, 46.8, 32.1. HPLC analysis: 96% ee, chiralcel OJ-H column,  $n$ -hexane/ $i$ -propanol = 85/15, flow rate = 0.8 mL/min, 40 °C, 230 nm,  $t_R$ : 14.4 min (major), 17.3 min (minor).

**(S)-1-Phenyl-3-(4-(trifluoromethyl)phenyl)pent-4-yn-1-one (3ia)**

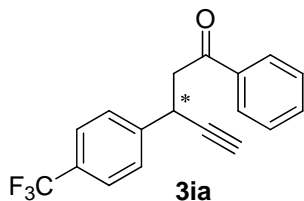

White solid, 80% yield. mp 63–65 °C.  $[\alpha]_D^{20} = 1.6$  ( $c = 0.90$ ,  $\text{CH}_2\text{Cl}_2$ ).  $^1\text{H}$  NMR (400 MHz,  $\text{CDCl}_3$ )  $\delta$  7.95–7.93 (m, 2H), 7.61–7.56 (m, 5H), 7.47 (t,  $J = 7.7$  Hz, 2H), 4.56–4.52 (m, 1H), 3.63 (dd,  $J = 17.3, 7.4$  Hz, 1H), 3.40 (dd,  $J = 17.3, 6.5$  Hz, 1H), 2.32 (d,  $J = 2.5$  Hz, 1H).  $^{13}\text{C}$  NMR (101 MHz,  $\text{CDCl}_3$ )  $\delta$  196.2, 144.6, 136.4, 133.5, 129.5 ( $J = 32.3$  Hz), 128.7, 128.1, 128.00, 125.63 ( $J = 3.7$  Hz), 124.05 ( $J = 272.1$  Hz), 84.4, 71.64, 46.7, 32.3. HPLC analysis: 96% ee, chiralcel OJ-H column,  $n$ -hexane/ $i$ -propanol = 85/15, flow rate = 1.0 mL/min, 40 °C, 230 nm,  $t_R$ : 7.2 min (major), 7.8 min (minor).

**(S)-3-(Naphthalen-2-yl)-1-phenylpent-4-yn-1-one (3ja)**

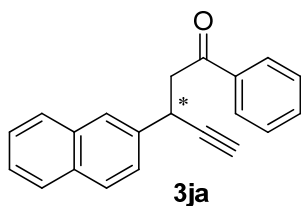

White solid, 85% yield. mp 122–124 °C.  $[\alpha]_{\text{D}}^{20} = 26.0$  ( $c = 0.82$ ,  $\text{CH}_2\text{Cl}_2$ ).  $^1\text{H}$  NMR (400 MHz,  $\text{CDCl}_3$ )  $\delta$  7.98–7.96 (m, 3H), 7.87–7.83 (m, 3H), 7.61–7.55 (m, 2H), 7.52–7.44 (m, 4H), 4.68–4.64 (m, 1H), 3.70 (dd,  $J = 17.2, 8.0$  Hz, 1H), 3.48 (dd,  $J = 17.2, 5.9$  Hz, 1H), 2.36 (s, 1H).  $^{13}\text{C}$  NMR (101 MHz,  $\text{CDCl}_3$ )  $\delta$  196.7, 137.9, 136.6, 133.4, 133.3, 132.6, 128.6, 128.5, 128.1, 127.8, 127.6, 126.2, 126.2, 125.9, 125.6, 85.3, 71.3, 46.9, 32.8. HPLC analysis: 96% ee, chiralcel OJ-H column, *n*-hexane/*i*-propanol = 85/15, flow rate = 1.0 mL/min, 40 °C, 230 nm,  $t_{\text{R}}$ : 20.9 min (major), 30.3 min (minor).

**(S)-1-Phenyl-3-(thiophen-2-yl)pent-4-yn-1-one (3ka)**

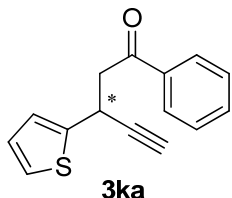

Colorless oil, 76% yield.  $[\alpha]_{\text{D}}^{20} = -14.1$  ( $c = 1.20$ ,  $\text{CH}_2\text{Cl}_2$ ).  $^1\text{H}$  NMR (400 MHz,  $\text{CDCl}_3$ )  $\delta$  7.97 (d,  $J = 7.5$  Hz, 2H), 7.58 (d,  $J = 6.9$  Hz, 1H), 7.47 (t,  $J = 7.2$  Hz, 2H), 7.19 (s, 1H), 7.09 (s, 1H), 6.95 (s, 1H), 4.77 (s, 1H), 3.65 (dd,  $J = 17.2, 7.2$  Hz, 1H), 3.53–3.47 (m, 1H), 2.33 (s, 1H).  $^{13}\text{C}$  NMR (101 MHz,  $\text{CDCl}_3$ )  $\delta$  196.3, 143.7, 136.5, 133.4, 128.7, 128.1, 126.8, 125.1, 124.4, 84.6, 71.0, 47.2, 27.9. HPLC analysis: 96% ee, chiralcel OD-H column, *n*-hexane/*i*-propanol = 95/5, flow rate = 0.7 mL/min, 40 °C, 230 nm,  $t_{\text{R}}$ : 12.8 min (major), 13.6 min (minor).

**(S)-3-Phenyl-1-*p*-tolylpent-4-yn-1-one (3ab).**

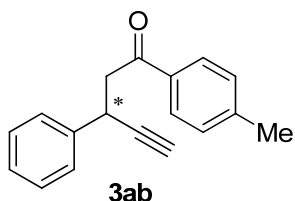

Colorless oil, 81% yield.  $[\alpha]_D^{20} = 4.5$  ( $c = 1.00$ ,  $\text{CH}_2\text{Cl}_2$ ).  $^1\text{H NMR}$  (400 MHz,  $\text{CDCl}_3$ )  $\delta$  7.87 (d,  $J = 8.2$  Hz, 2H), 7.49 (d,  $J = 7.3$  Hz, 2H), 7.37 (t,  $J = 7.5$  Hz, 2H), 7.28 (t,  $J = 7.3$  Hz, 3H), 4.49–4.46 (m, 1H), 3.60 (dd,  $J = 17.0, 8.1$  Hz, 1H), 3.35 (dd,  $J = 17.0, 6.0$  Hz, 1H), 2.43 (s, 3H), 2.29 (d,  $J = 2.3$  Hz, 1H).  $^{13}\text{C NMR}$  (101 MHz,  $\text{CDCl}_3$ )  $\delta$  196.3, 144.1, 140.7, 134.2, 129.3, 128.7, 128.2, 127.5, 127.1, 85.4, 71.0, 46.9, 32.7, 21.6. HPLC analysis: 96% ee, chiralcel OJ-H column, *n*-hexane/*i*-propanol = 85/15, flow rate = 1.0 mL/min, 40 °C, 210 nm,  $t_R$ : 11.3 min (major), 15.6 min (minor).

**(S)-1-(4-Methoxyphenyl)-3-phenylpent-4-yn-1-one (3ac).**

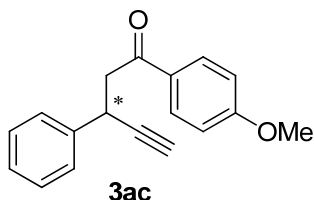

White solid, 88% yield. mp 62–64 °C.  $[\alpha]_D^{20} = 2.4$  ( $c = 1.20$ ,  $\text{CH}_2\text{Cl}_2$ ).  $^1\text{H NMR}$  (400 MHz,  $\text{CDCl}_3$ )  $\delta$  7.95 (d,  $J = 8.9$  Hz, 2H), 7.49 (d,  $J = 7.3$  Hz, 2H), 7.36 (t,  $J = 7.5$  Hz, 2H), 7.27 (t,  $J = 7.3$  Hz, 1H), 6.94 (d,  $J = 8.9$  Hz, 2H), 4.49–4.45 (m, 1H), 3.87 (s, 3H), 3.57 (dd,  $J = 16.8, 8.1$  Hz, 1H), 3.32 (dd,  $J = 16.8, 6.0$  Hz, 1H), 2.29 (d,  $J = 2.5$  Hz, 1H).  $^{13}\text{C NMR}$  (101 MHz,  $\text{CDCl}_3$ )  $\delta$  195.2, 163.6, 140.8, 130.4, 129.7, 128.7, 127.5, 127.1, 113.7, 85.5, 71.0, 55.5, 46.7, 32.8. HPLC analysis: 96% ee, chiralcel OJ-H column, *n*-hexane/*i*-propanol = 80/20, flow rate = 0.8 mL/min, 40 °C, 230 nm,  $t_R$ : 21.2 min (major), 32.3 min (minor).



**(S)-1-(4-Fluorophenyl)-3-phenylpent-4-yn-1-one (3ad)**

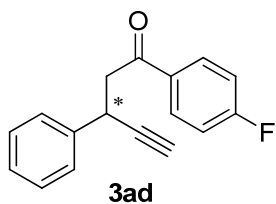

White solid, 83% yield. mp 70–71 °C.  $[\alpha]_D^{20} = 6.4$  ( $c = 0.90$ ,  $\text{CH}_2\text{Cl}_2$ ).  $^1\text{H}$  NMR (400 MHz,  $\text{CDCl}_3$ )  $\delta$  7.98 (dd,  $J = 8.3, 5.7$  Hz, 2H), 7.48 (d,  $J = 7.6$  Hz, 2H), 7.37 (t,  $J = 7.5$  Hz, 2H), 7.28 (t,  $J = 7.3$  Hz, 1H), 7.13 (t,  $J = 8.5$  Hz, 2H), 4.47–4.44 (m, 1H), 3.59 (dd,  $J = 17.0, 8.1$  Hz, 1H), 3.34 (dd,  $J = 17.0, 5.9$  Hz, 1H), 2.30 (d,  $J = 2.2$  Hz, 1H).  $^{13}\text{C}$  NMR (101 MHz,  $\text{CDCl}_3$ )  $\delta$  195.2, 165.82 ( $J = 255.2$  Hz), 140.5, 133.1, 133.1, 130.8 ( $J = 9.3$  Hz), 128.7, 127.4, 127.2, 115.7 (d,  $J = 21.9$  Hz), 85.2, 71.1, 46.9, 32.7. HPLC analysis: 96% ee, chiralcel OJ-H column,  $n$ -hexane/ $i$ -propanol = 80/20, flow rate = 1.0 mL/min, 40 °C, 230 nm,  $t_R$ : 14.1 min (major), 17.0 min (minor).

**(S)-1-(3-Chlorophenyl)-3-phenylpent-4-yn-1-one (3ae)**

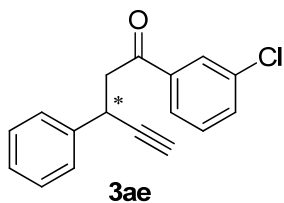

Colorless oil, 87% yield.  $[\alpha]_D^{20} = 6.0$  ( $c = 1.10$ ,  $\text{CH}_2\text{Cl}_2$ ).  $^1\text{H}$  NMR (400 MHz,  $\text{CDCl}_3$ )  $\delta$  7.93 (s, 1H), 7.83 (d,  $J = 7.6$  Hz, 1H), 7.55 (d,  $J = 7.2$  Hz, 1H), 7.48 (d,  $J = 7.0$  Hz, 2H), 7.43–7.35 (m, 3H), 7.29 (d,  $J = 6.8$  Hz, 1H), 4.45 (s, 1H), 3.59 (dd,  $J = 17.0, 8.1$  Hz, 1H), 3.35 (dd,  $J = 17.1, 3.9$  Hz, 1H), 2.30 (s, 1H).  $^{13}\text{C}$  NMR (101 MHz,  $\text{CDCl}_3$ )  $\delta$  195.5, 140.3, 138.1, 135.0, 133.2, 129.9, 128.8, 128.3, 127.4, 127.3, 126.2, 85.0, 71.2, 47.1, 32.6. HPLC analysis: 96% ee, chiralcel OJ-H column,  $n$ -hexane/ $i$ -propanol = 90/10, flow rate = 0.8 mL/min, 40 °C, 230 nm,  $t_R$ : 18.7 min (major), 25.0 min (minor).

**(S)-1-(4-Chlorophenyl)-3-phenylpent-4-yn-1-one (3af)**

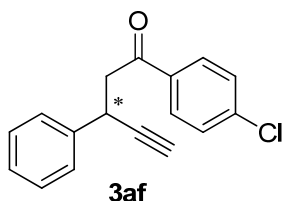

White solid, 86% yield. mp 91–93 °C.  $[\alpha]_D^{20} = 11.1$  ( $c = 1.00$ ,  $\text{CH}_2\text{Cl}_2$ ).  $^1\text{H}$  NMR (400 MHz,  $\text{CDCl}_3$ )  $\delta$  7.90–7.88 (m, 2H), 7.49 (d,  $J = 7.3$  Hz, 2H), 7.42–7.42 (m, 2H), 7.37 (t,  $J = 7.5$  Hz, 2H), 7.30–7.27 (m, 1H), 4.48–4.44 (m, 1H), 3.58 (dd,  $J = 17.1, 8.1$  Hz, 1H), 3.34 (dd,  $J = 17.1, 5.9$  Hz, 1H), 2.31 (d,  $J = 2.5$  Hz, 1H).  $^{13}\text{C}$  NMR (101 MHz,  $\text{CDCl}_3$ )  $\delta$  195.5, 140.4, 139.7, 134.9, 129.5, 128.9, 128.8, 127.5, 127.26, 85.1, 71.2, 47.0, 32.7. HPLC analysis: 97% ee, chiralpak AD-H column,  $n$ -hexane/ $i$ -propanol = 95/5, flow rate = 0.7 mL/min, 40 °C, 230 nm,  $t_R$ : 15.1 min (major), 16.8 min (minor).

**(S)-1-(4-Bromophenyl)-3-phenylpent-4-yn-1-one (3ag)**

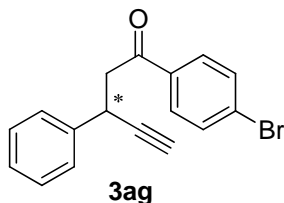

White solid, 80% yield. mp 96–97 °C.  $[\alpha]_D^{20} = 8.6$  ( $c = 1.00$ ,  $\text{CH}_2\text{Cl}_2$ ).  $^1\text{H}$  NMR (400 MHz,  $\text{CDCl}_3$ )  $\delta$  7.81 (d,  $J = 8.6$  Hz, 2H), 7.61 (d,  $J = 8.6$  Hz, 2H), 7.47 (d,  $J = 7.4$  Hz, 2H), 7.36 (t,  $J = 7.5$  Hz, 2H), 7.28 (t,  $J = 7.3$  Hz, 1H), 4.46–4.42 (m, 1H), 3.57 (dd,  $J = 17.0, 8.2$  Hz, 1H), 3.33 (dd,  $J = 17.1, 5.9$  Hz, 1H), 2.29 (d,  $J = 2.5$  Hz, 1H).  $^{13}\text{C}$  NMR (101 MHz,  $\text{CDCl}_3$ )  $\delta$  195.8, 140.4, 135.3, 131.9, 129.6, 128.7, 128.5, 127.4, 127.3, 85.1, 71.2, 47.0, 32.7. HPLC analysis: 96% ee, chiralcel OJ-H column,  $n$ -hexane/ $i$ -propanol = 80/20, flow rate = 0.8 mL/min, 40 °C, 230 nm,  $t_R$ : 20.9 min (major), 27.0 min (minor).

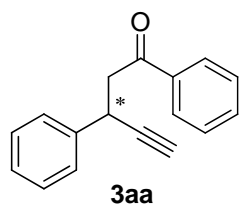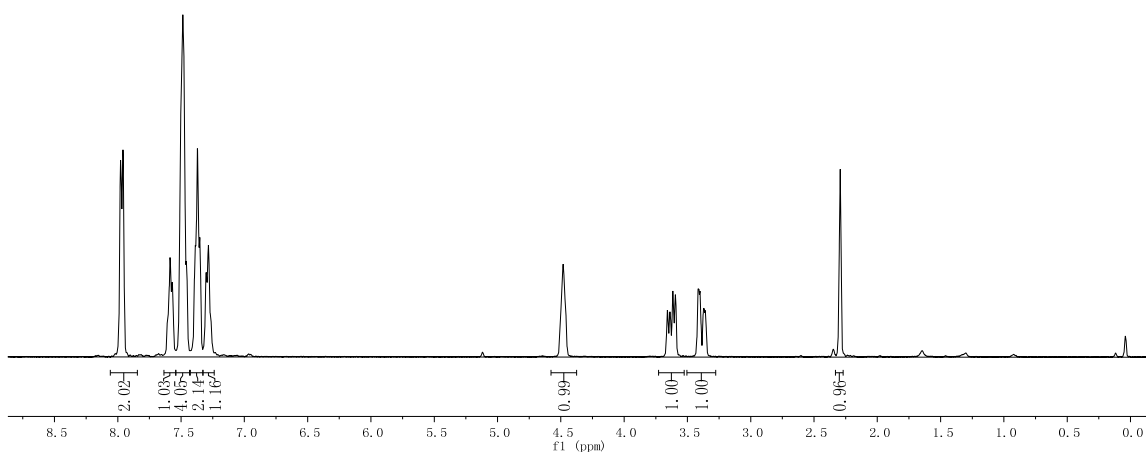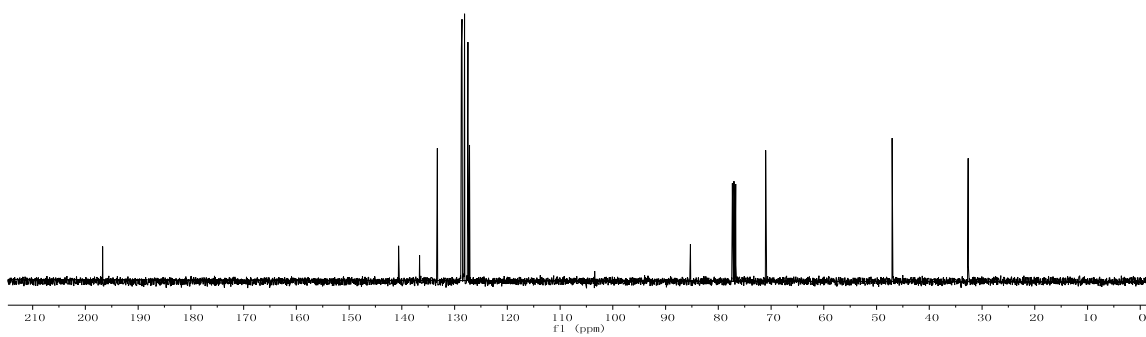

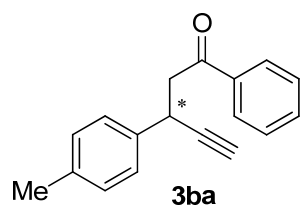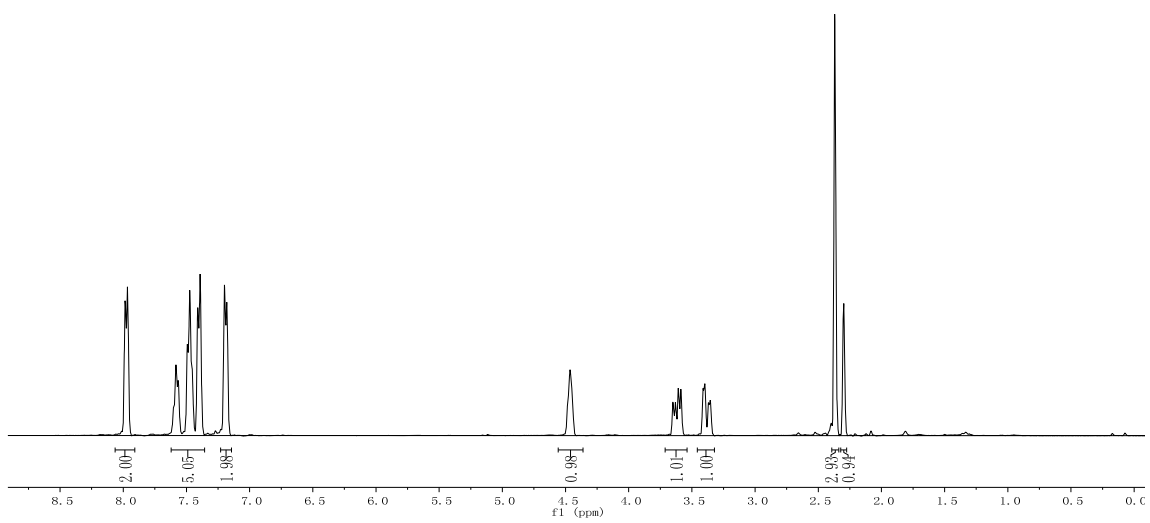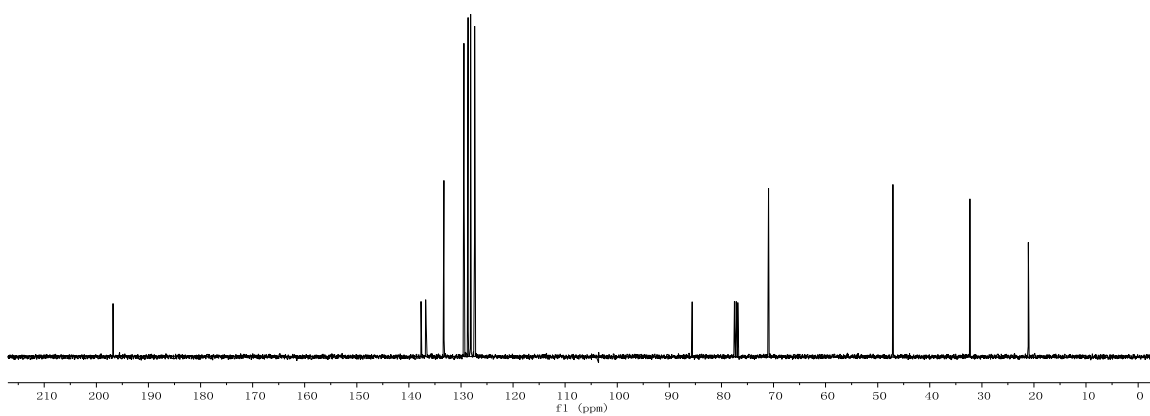

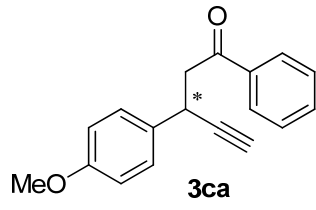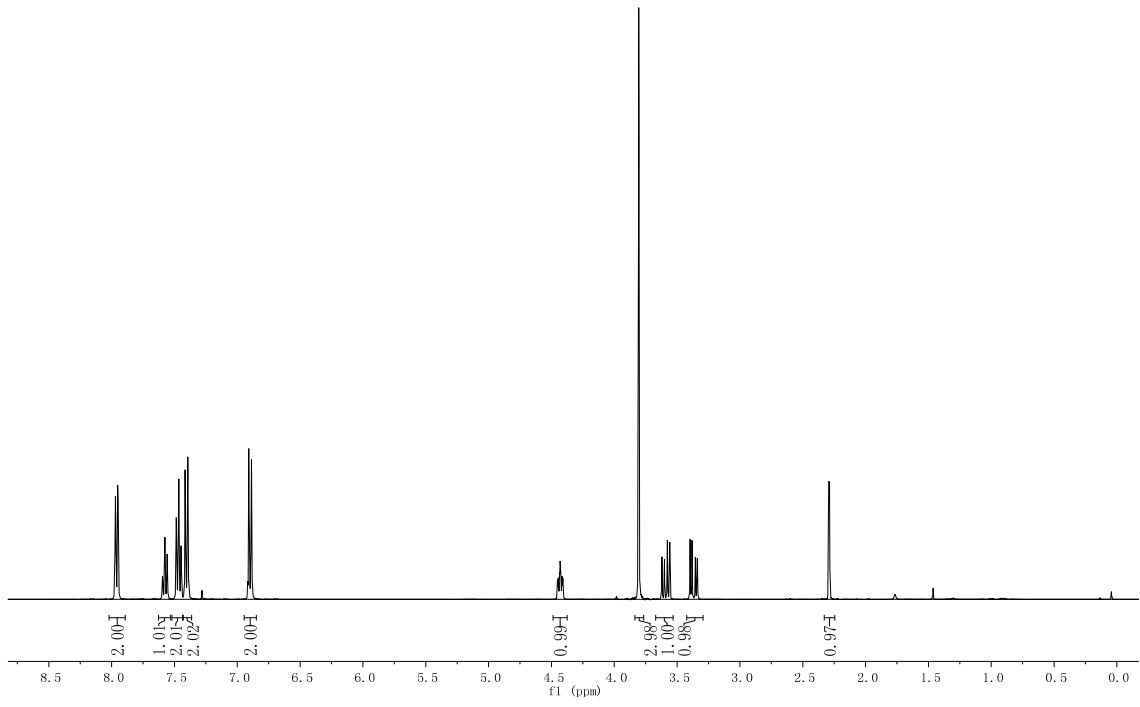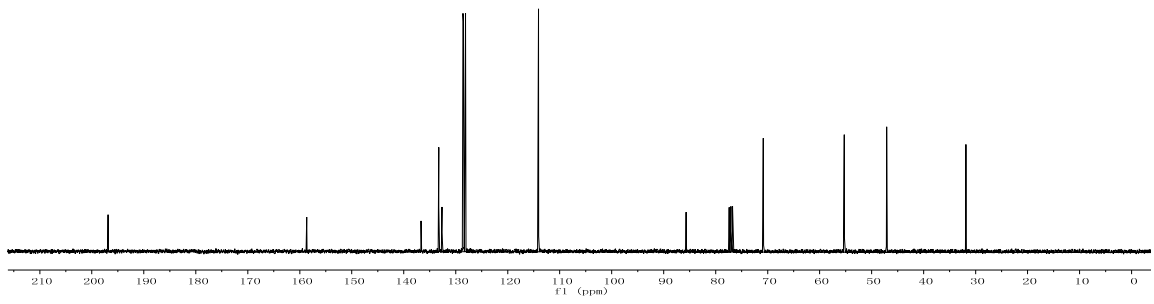

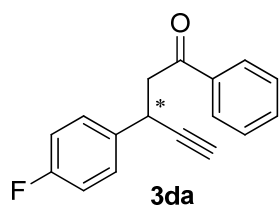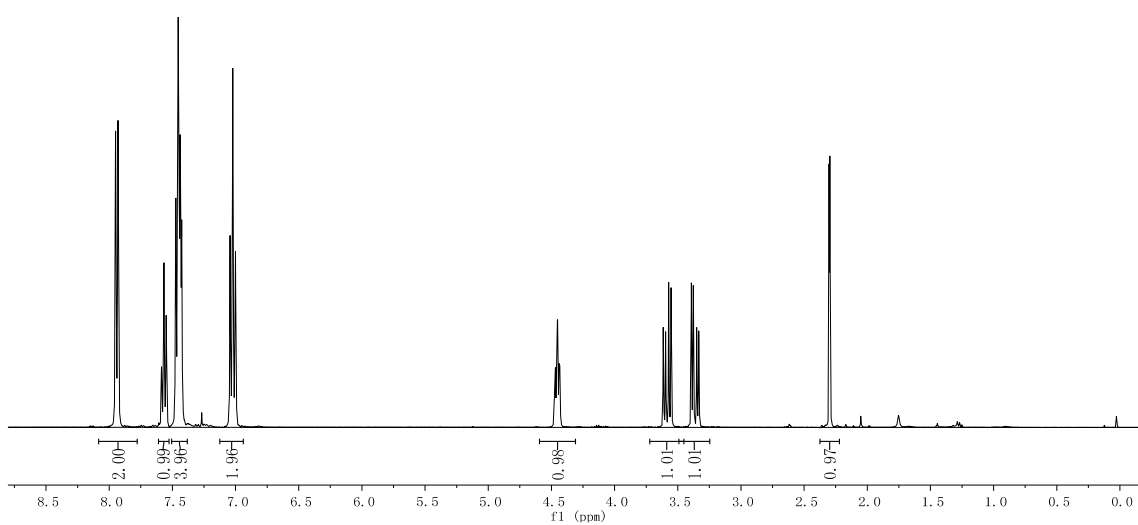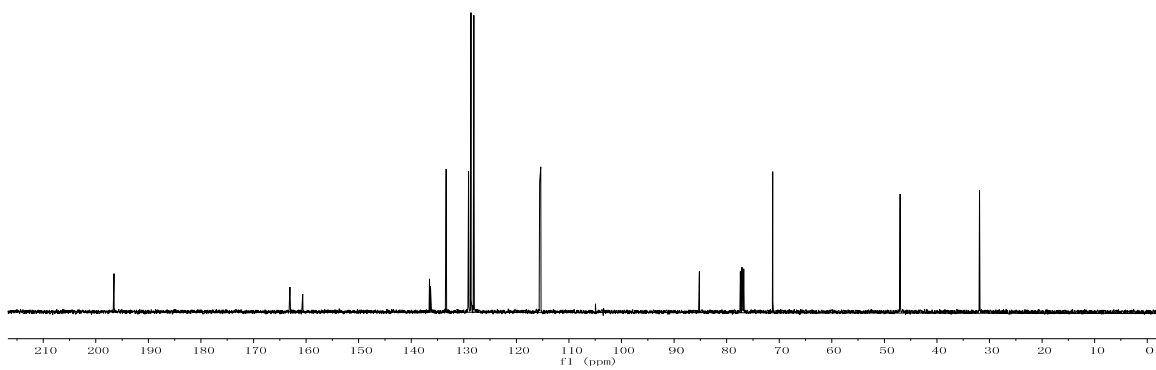

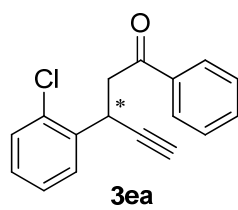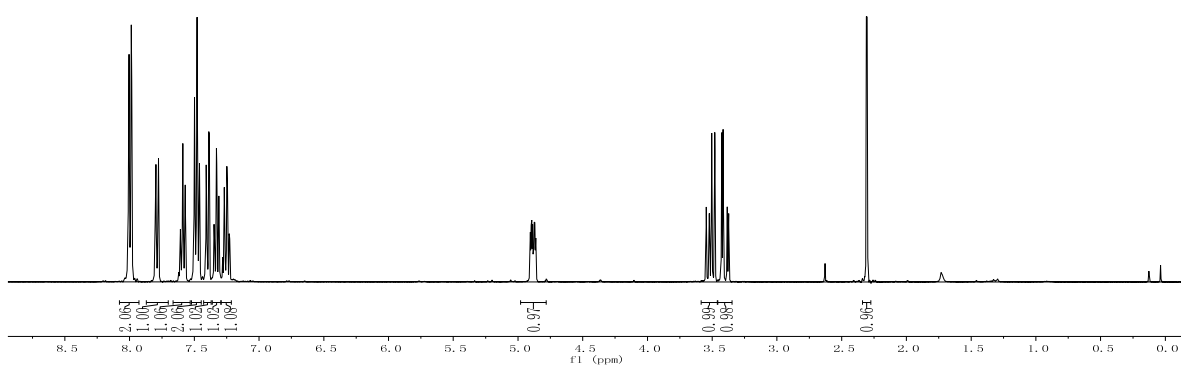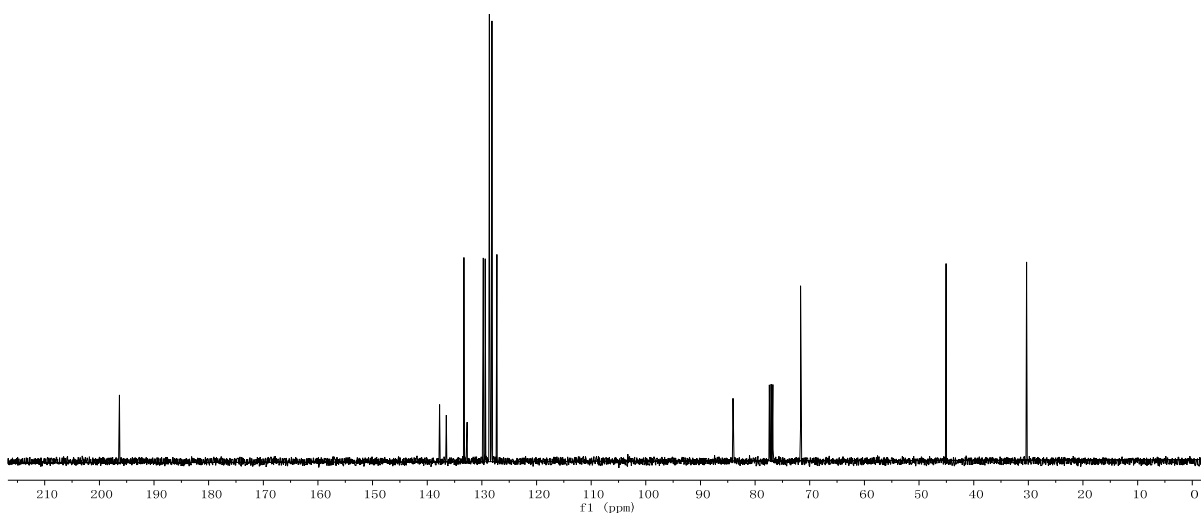

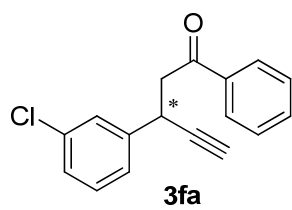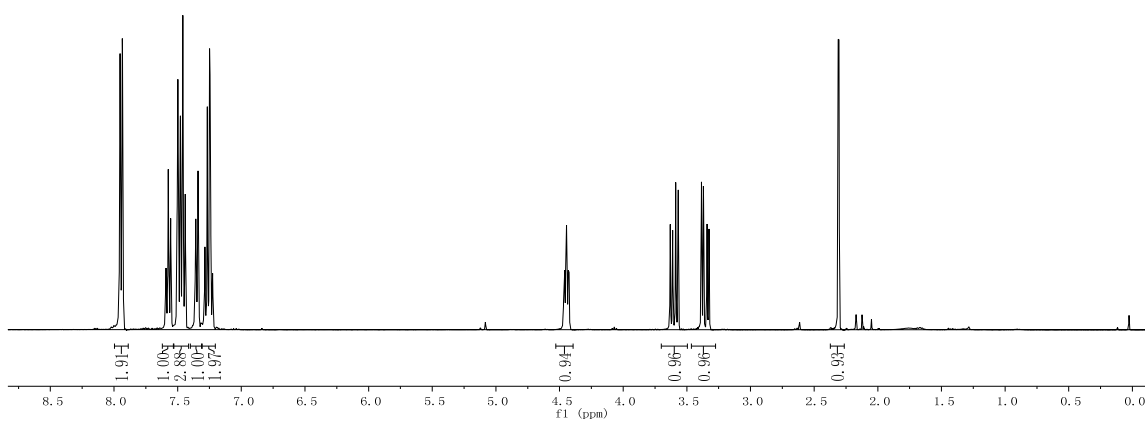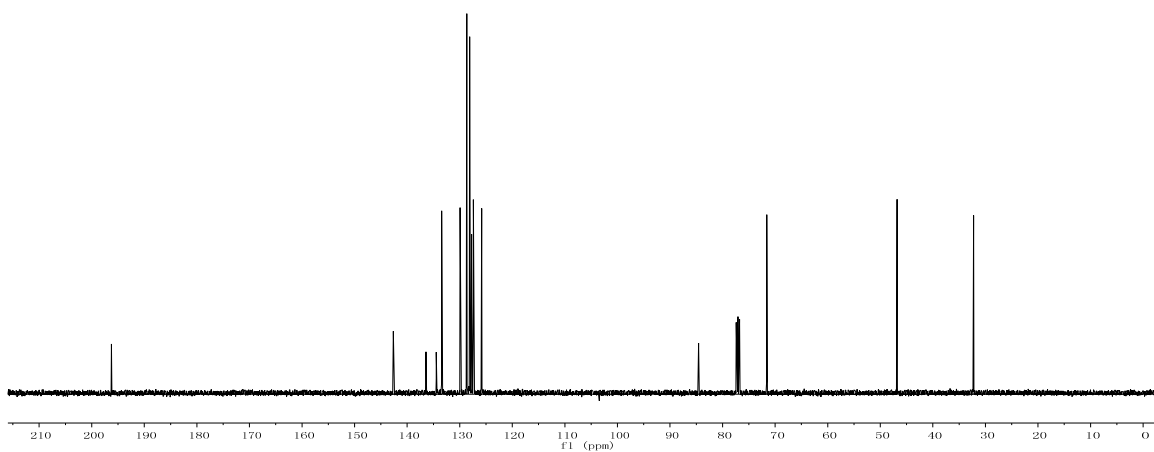



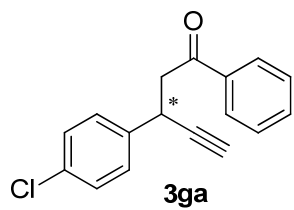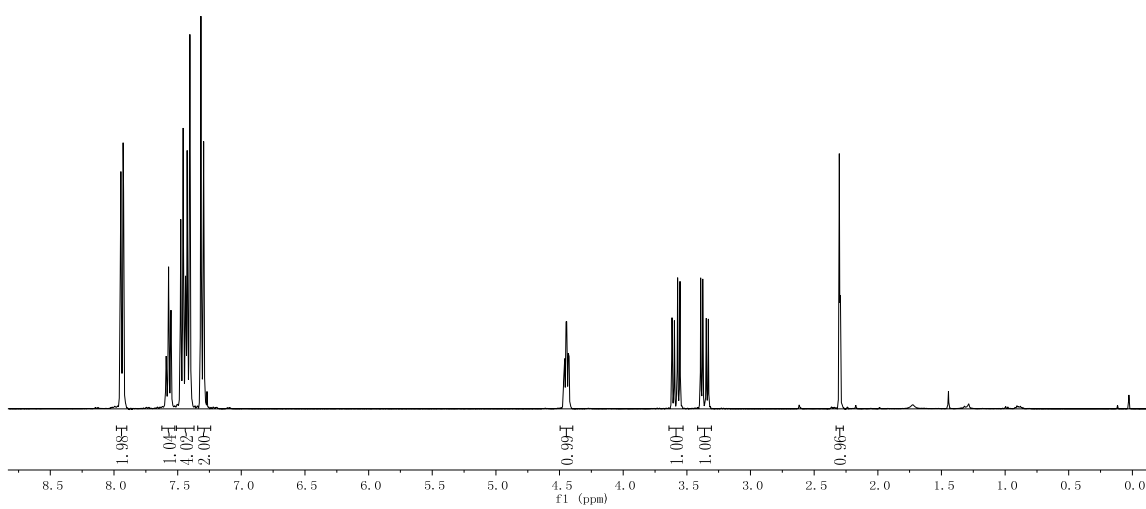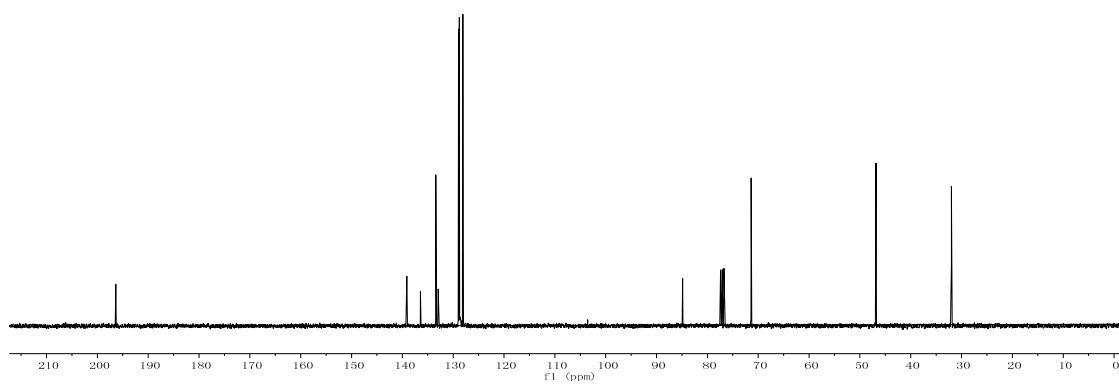

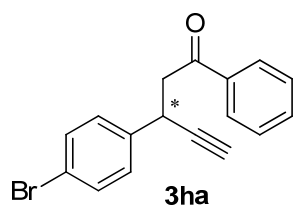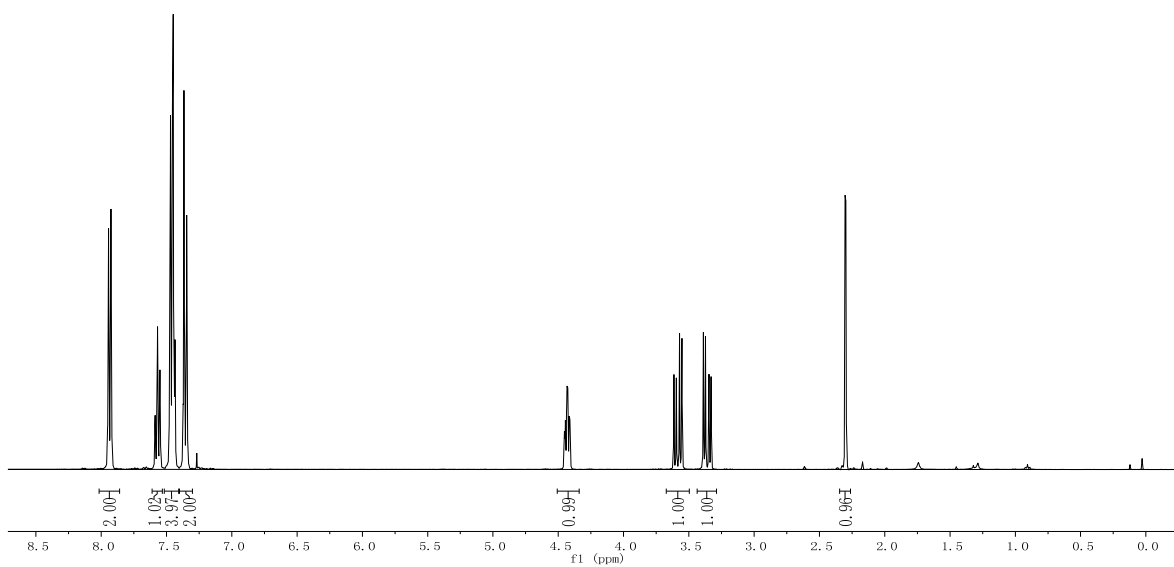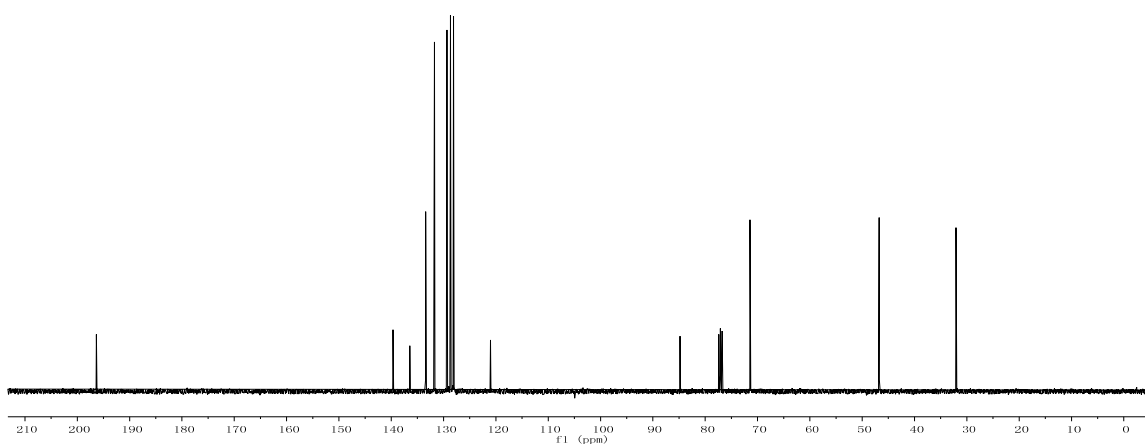

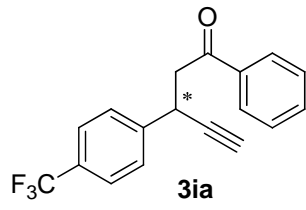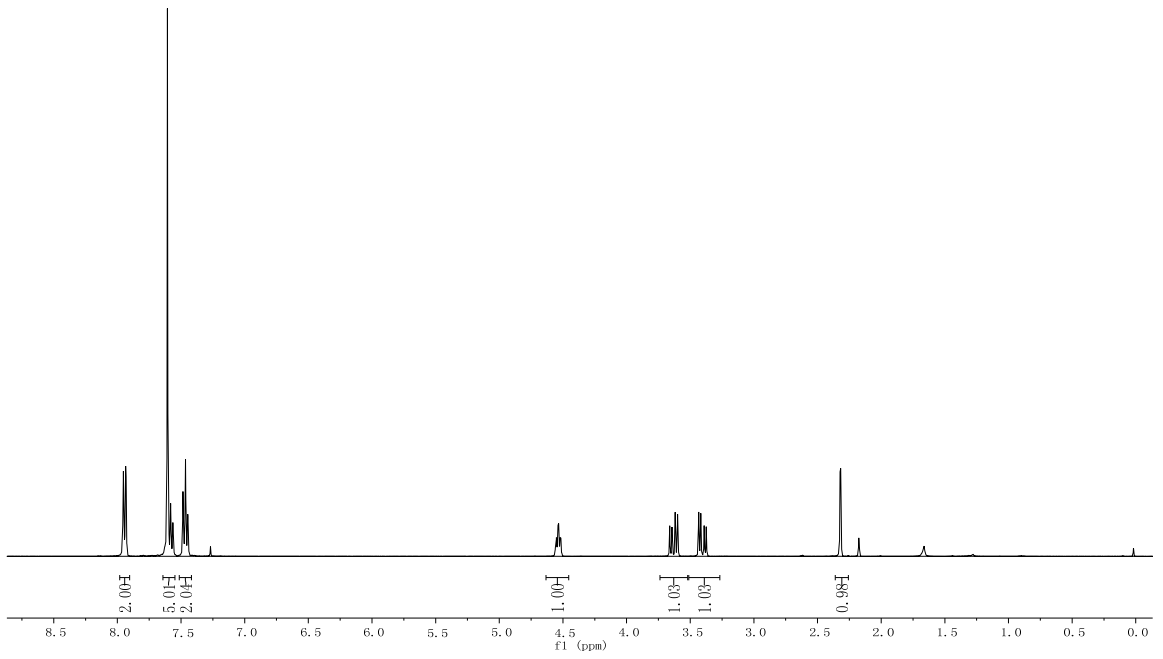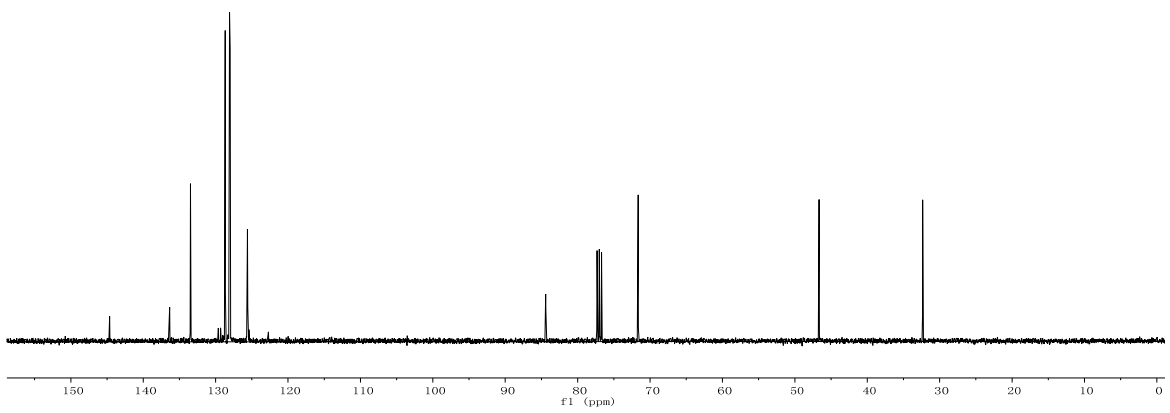

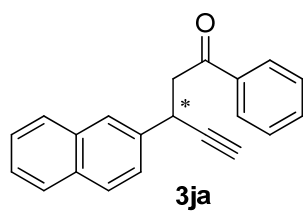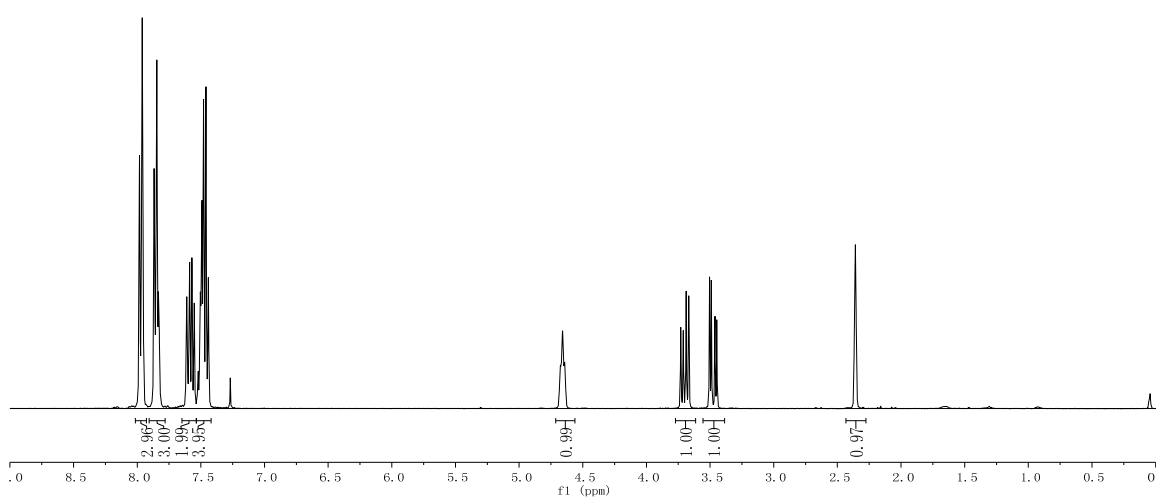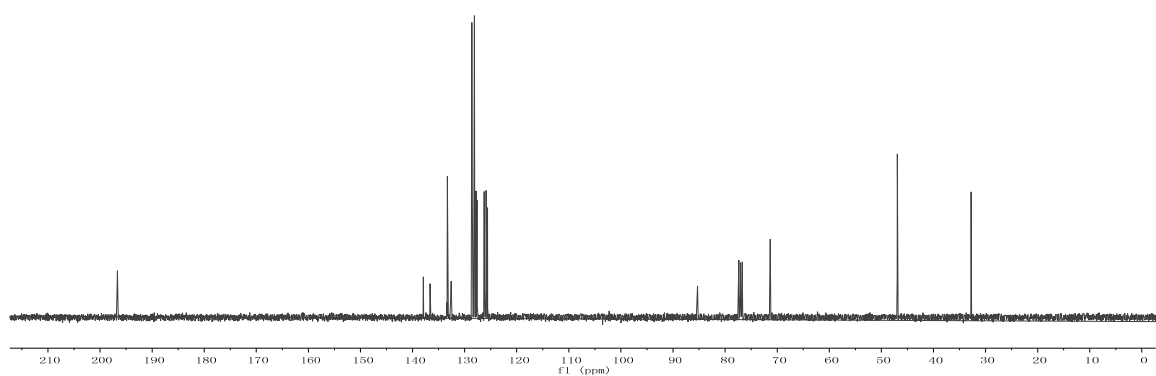

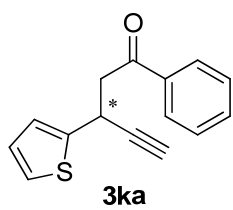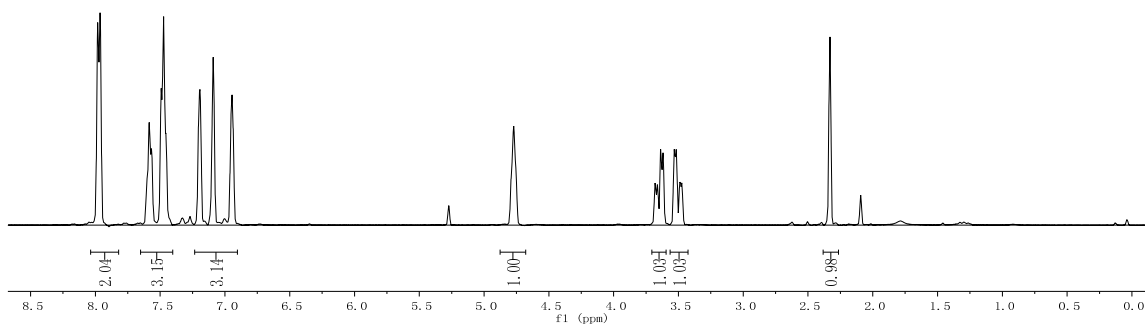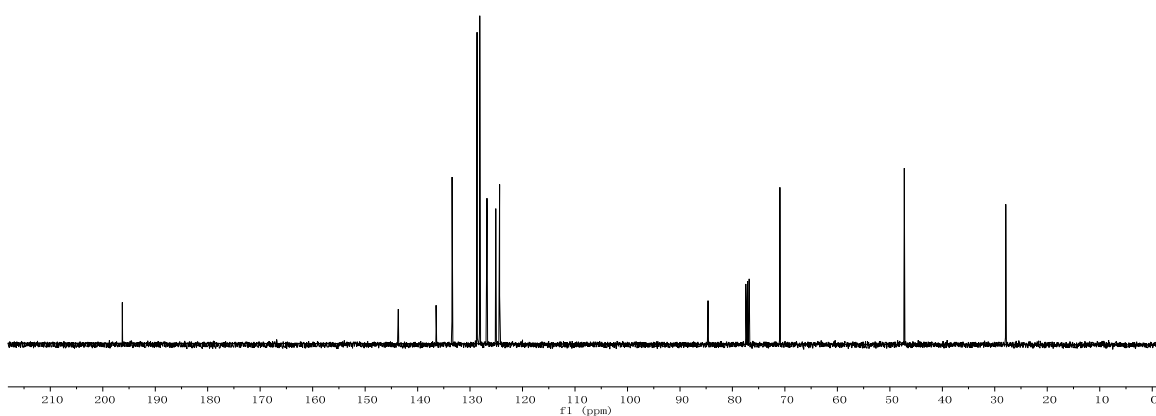

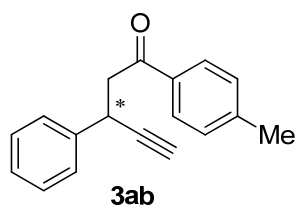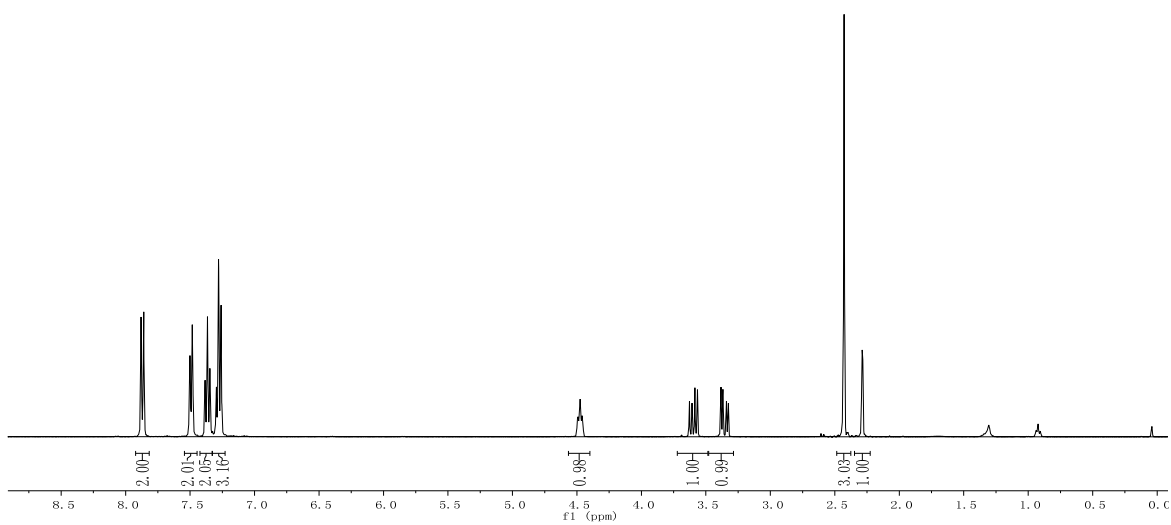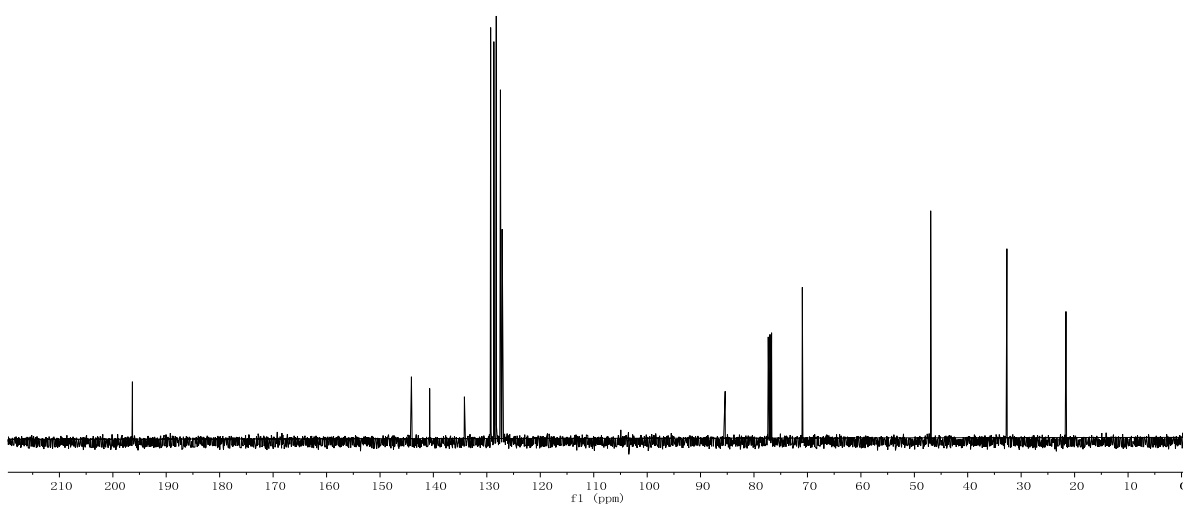

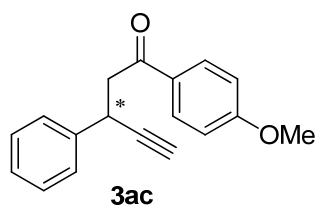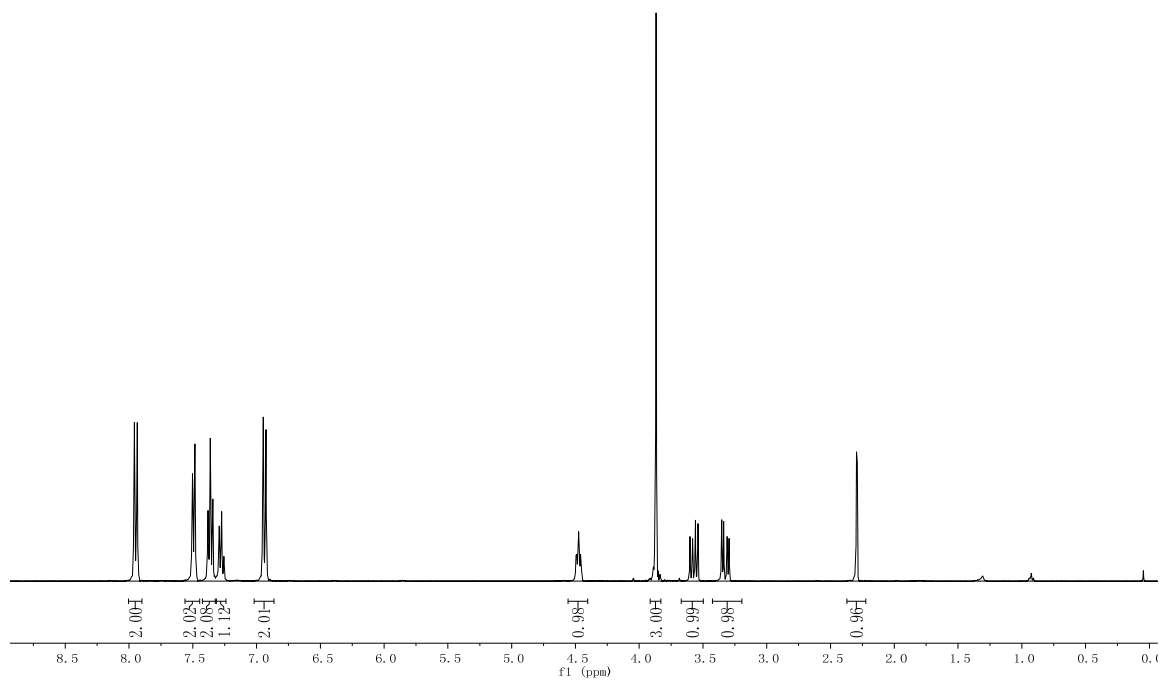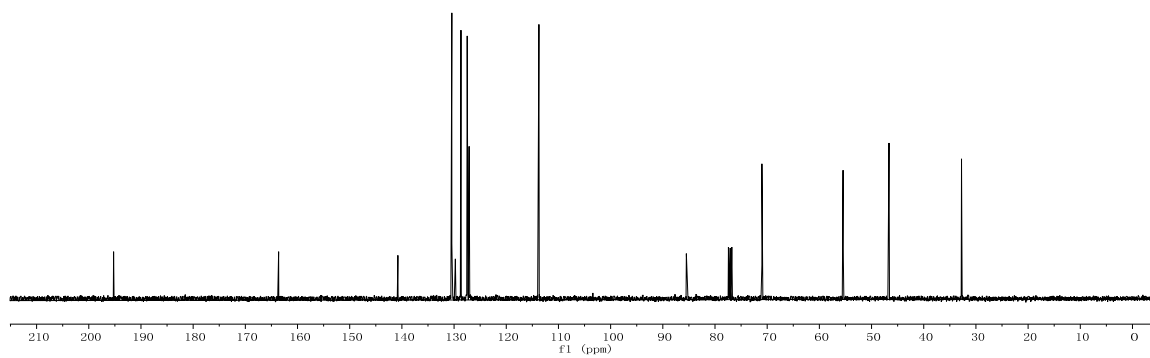

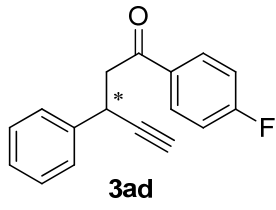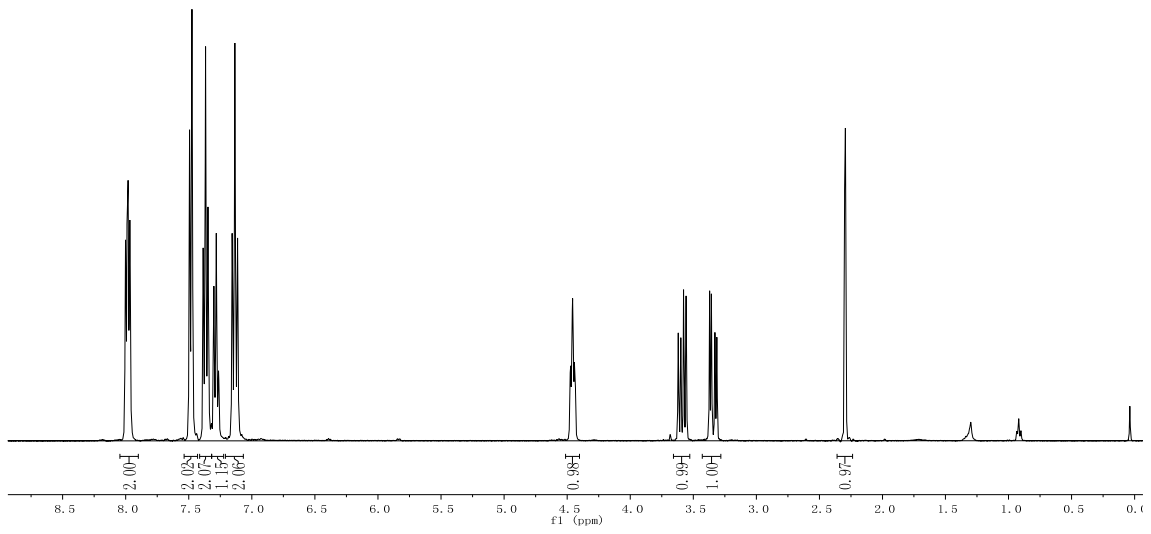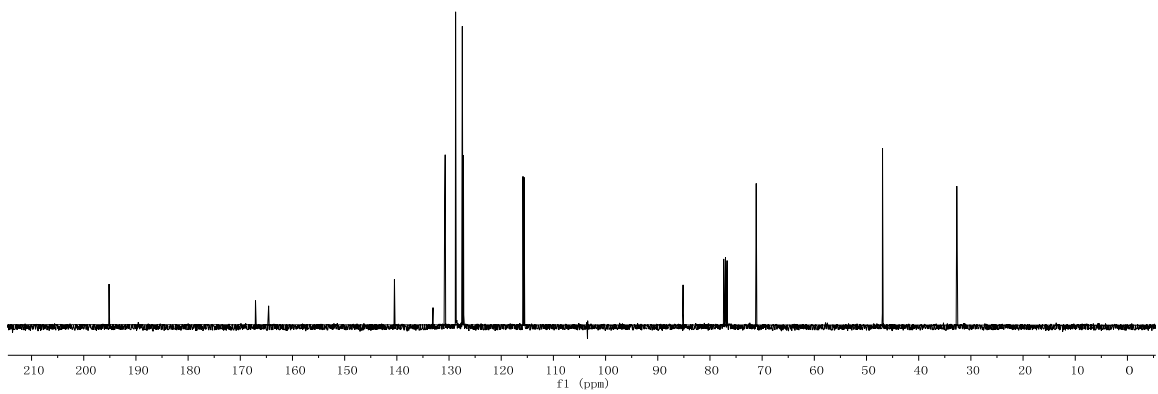



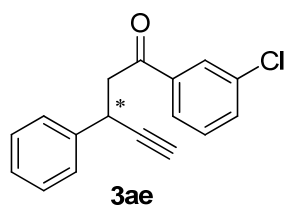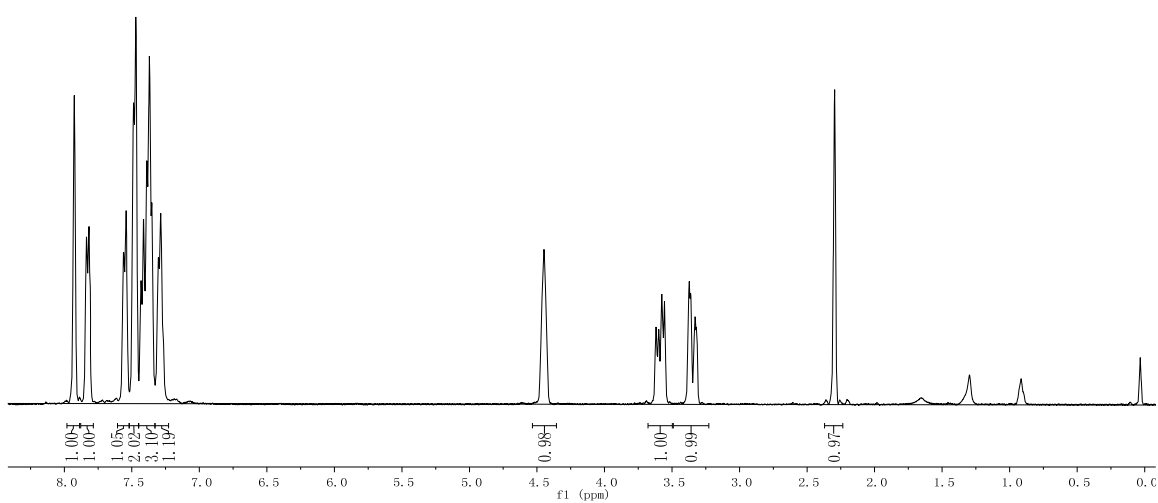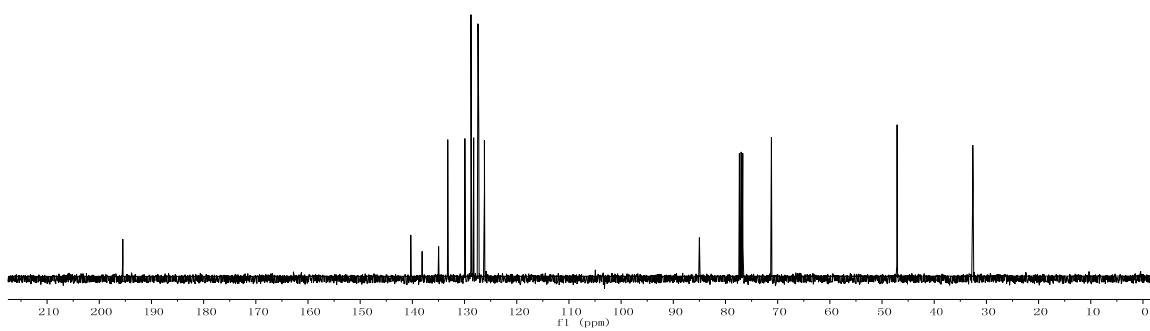

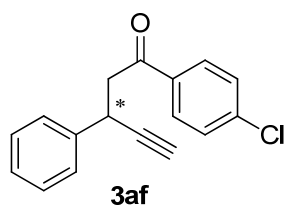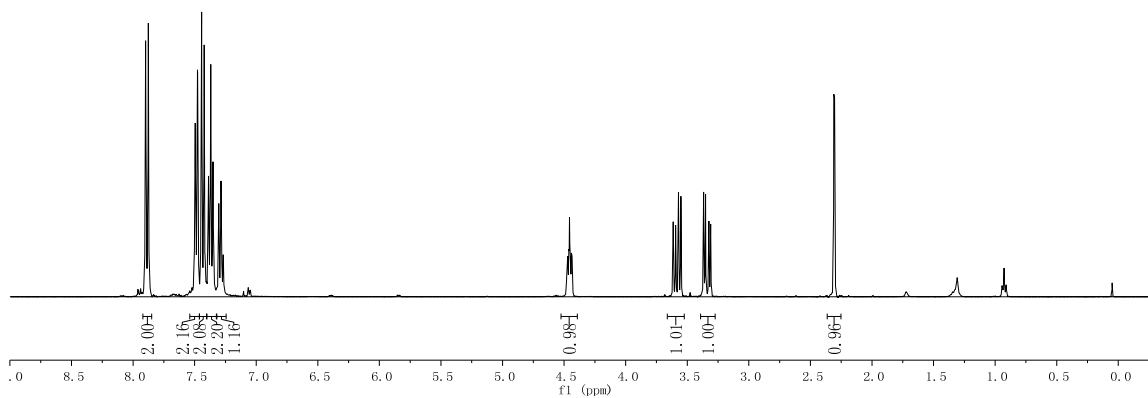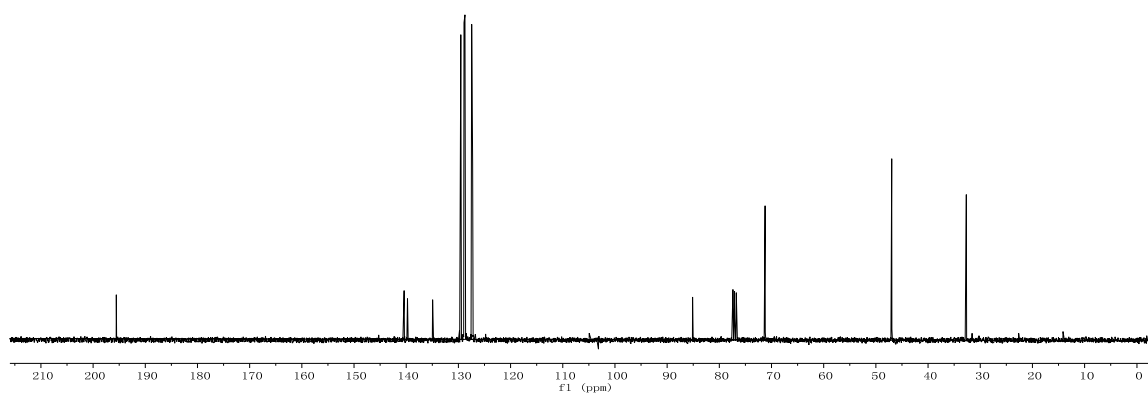

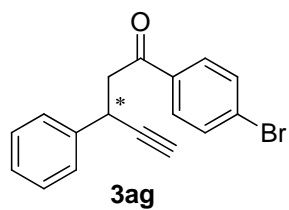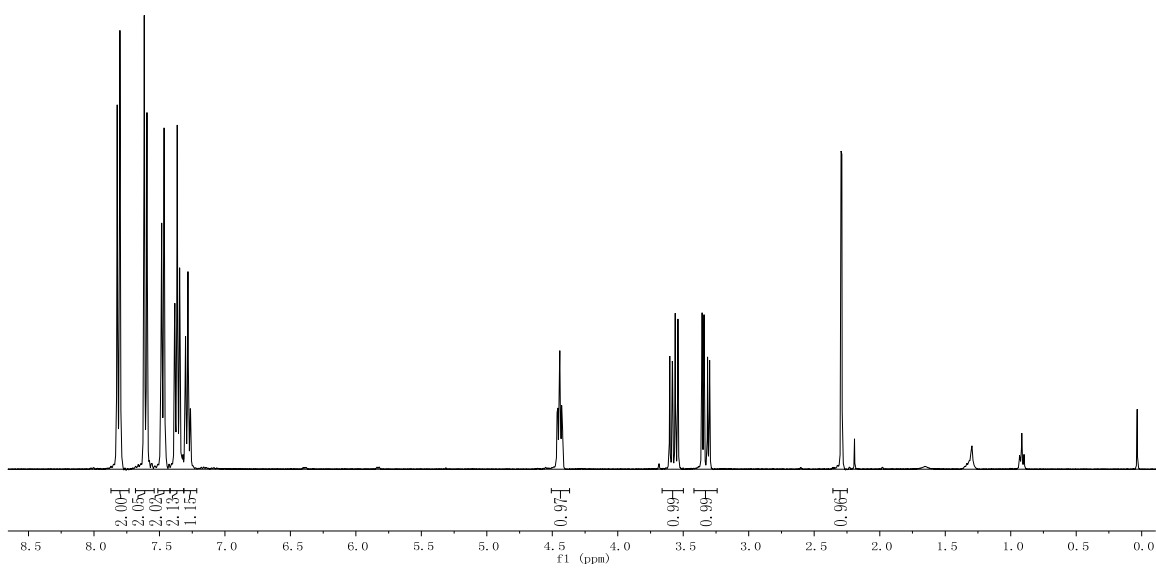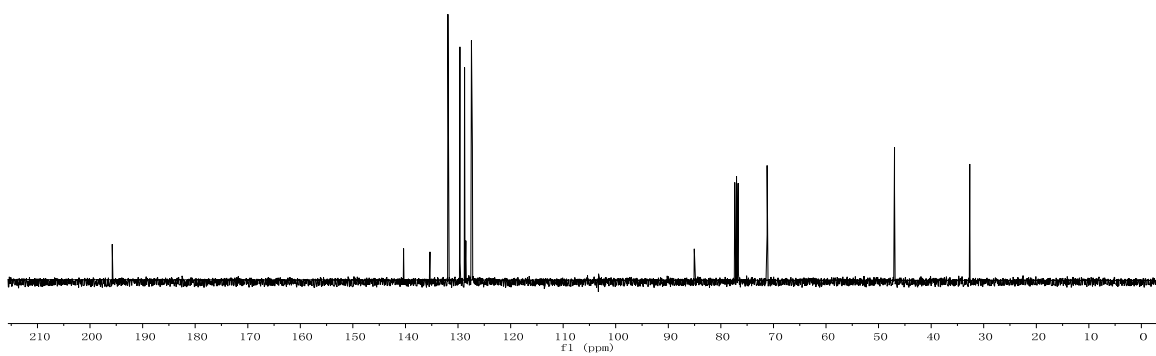

### HPLC chromatogram of racemic product 3aa

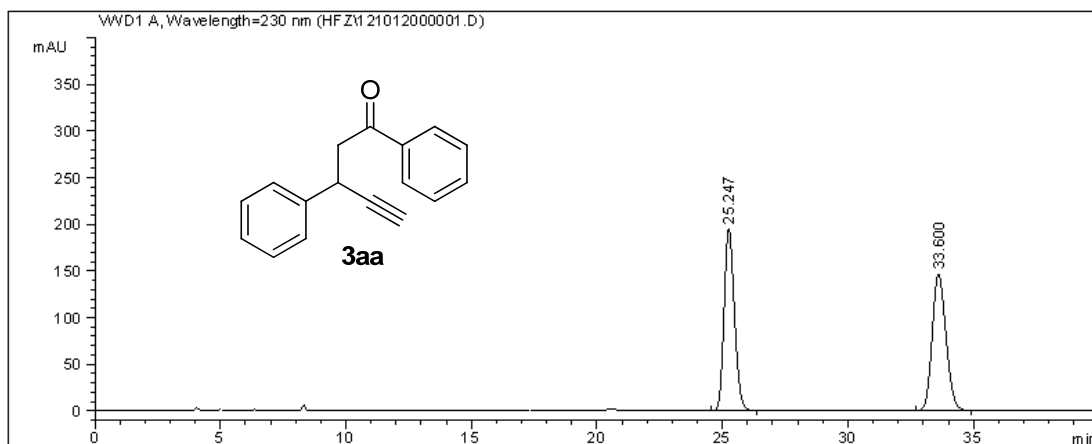

| # | Time   | Area   | Height | Width  | Area%  | Symmetry |
|---|--------|--------|--------|--------|--------|----------|
| 1 | 25.247 | 5577.6 | 194.9  | 0.443  | 49.911 | 0.795    |
| 2 | 33.6   | 5597.4 | 146.5  | 0.5972 | 50.089 | 0.807    |

### HPLC chromatogram of chiral product 3aa

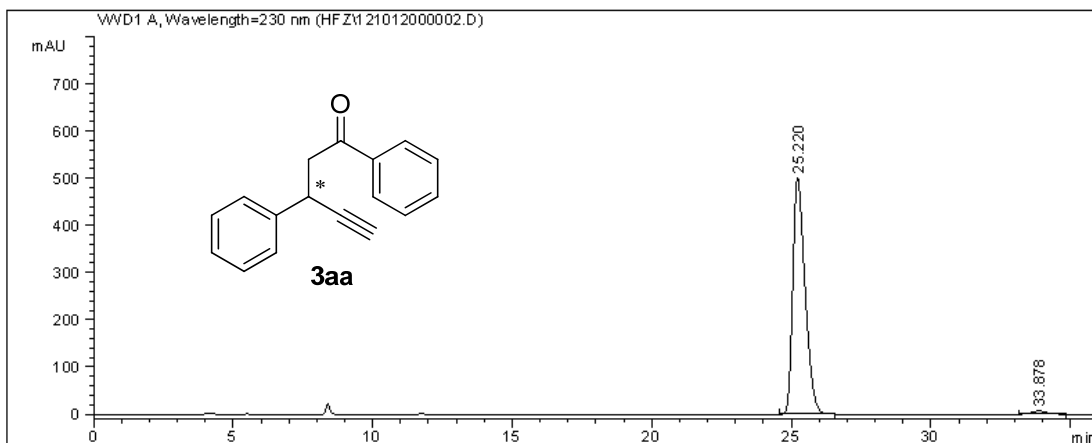

| # | Time   | Area    | Height | Width  | Area%  | Symmetry |
|---|--------|---------|--------|--------|--------|----------|
| 1 | 25.22  | 15304.6 | 501.4  | 0.4653 | 98.414 | 0.605    |
| 2 | 33.878 | 246.7   | 6.7    | 0.5695 | 1.586  | 0.943    |

### HPLC chromatogram of racemic product 3ba

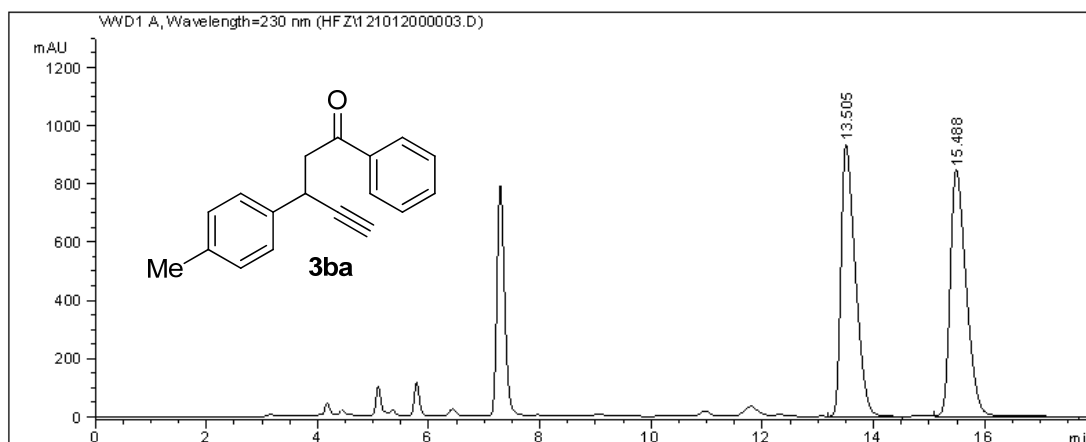

| # | Time   | Area    | Height | Width  | Area%  | Symmetry |
|---|--------|---------|--------|--------|--------|----------|
| 1 | 13.505 | 16747.7 | 935.8  | 0.2699 | 49.620 | 0.513    |
| 2 | 15.488 | 17004.2 | 848.2  | 0.3038 | 50.380 | 0.578    |

### HPLC chromatogram of chiral product 3ba

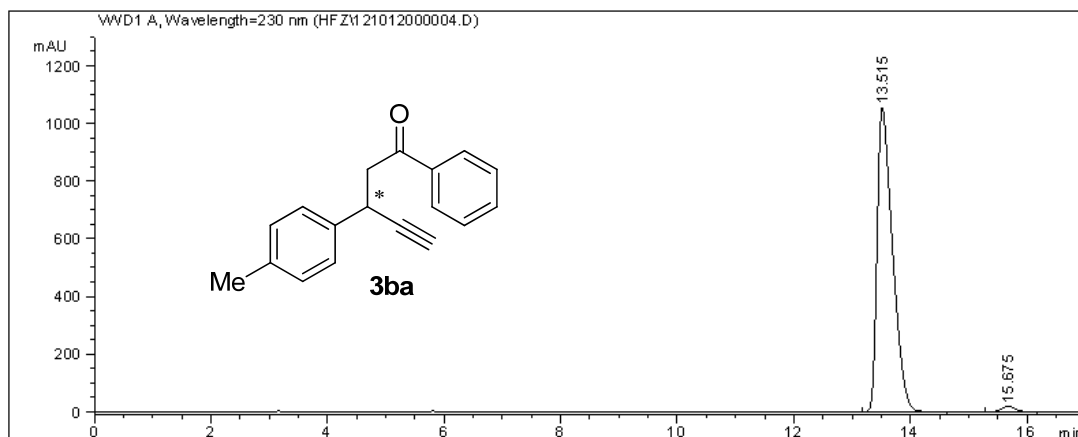

| # | Time   | Area    | Height | Width  | Area%  | Symmetry |
|---|--------|---------|--------|--------|--------|----------|
| 1 | 13.515 | 19380.7 | 1056.3 | 0.2781 | 98.314 | 0.476    |
| 2 | 15.675 | 332.4   | 18.7   | 0.2768 | 1.686  | 0.968    |

### HPLC chromatogram of racemic product 3ca

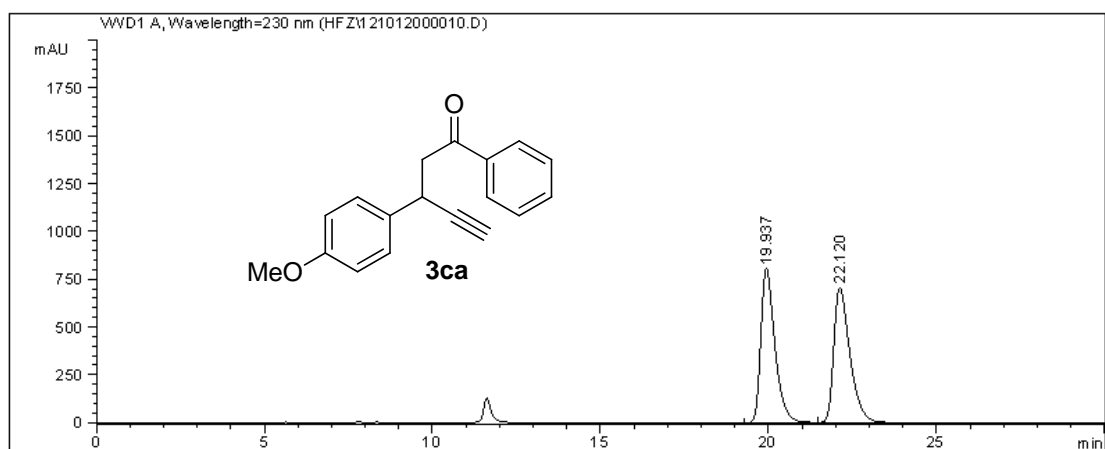

| # | Time   | Area    | Height | Width  | Area%  | Symmetry |
|---|--------|---------|--------|--------|--------|----------|
| 1 | 19.937 | 23441.5 | 806    | 0.4383 | 49.878 | 0.615    |
| 2 | 22.12  | 23556.6 | 705.9  | 0.5043 | 50.122 | 0.566    |

### HPLC chromatogram of chiral product 3ca

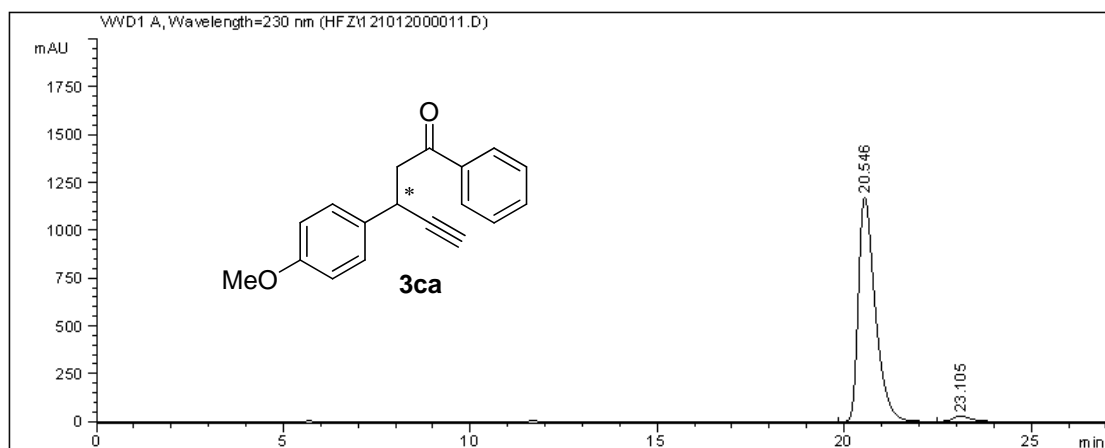

| # | Time   | Area    | Height | Width  | Area%  | Symmetry |
|---|--------|---------|--------|--------|--------|----------|
| 1 | 20.546 | 36715.8 | 1171.3 | 0.472  | 97.482 | 0.561    |
| 2 | 23.105 | 948.3   | 26.8   | 0.5383 | 2.518  | 0.703    |

### HPLC chromatogram of racemic product 3da

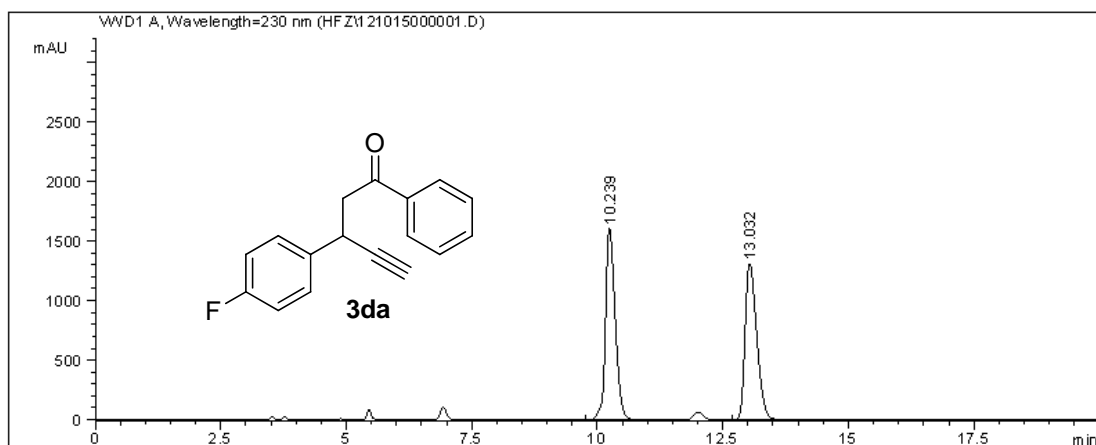

| # | Time   | Area    | Height | Width  | Area%  | Symmetry |
|---|--------|---------|--------|--------|--------|----------|
| 1 | 10.239 | 21663.4 | 1611.1 | 0.2064 | 50.505 | 0.659    |
| 2 | 13.032 | 21229.8 | 1315.3 | 0.2495 | 49.495 | 0.615    |

### HPLC chromatogram of chiral product 3da

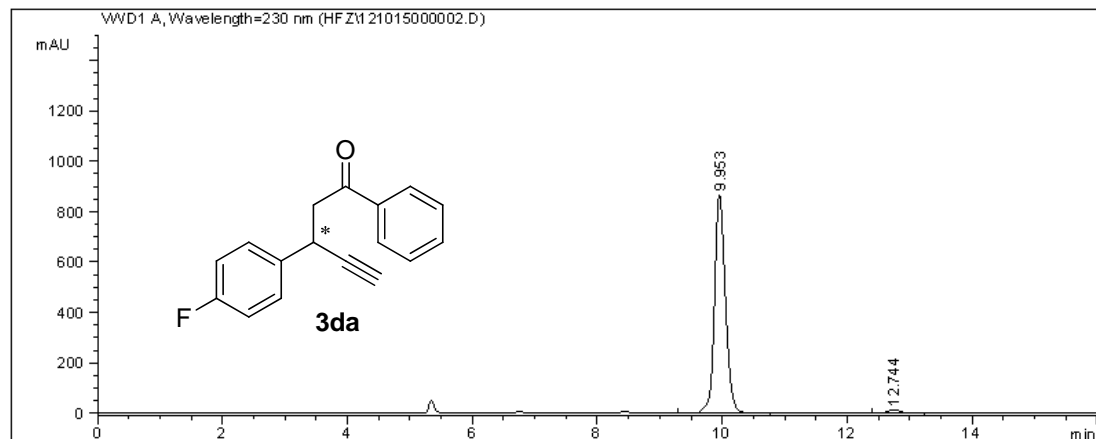

| # | Time   | Area  | Height | Width  | Area%  | Symmetry |
|---|--------|-------|--------|--------|--------|----------|
| 1 | 9.953  | 10546 | 867.7  | 0.1855 | 98.205 | 0.791    |
| 2 | 12.744 | 192.8 | 13     | 0.2303 | 1.795  | 0.931    |

### HPLC chromatogram of racemic product 3ea

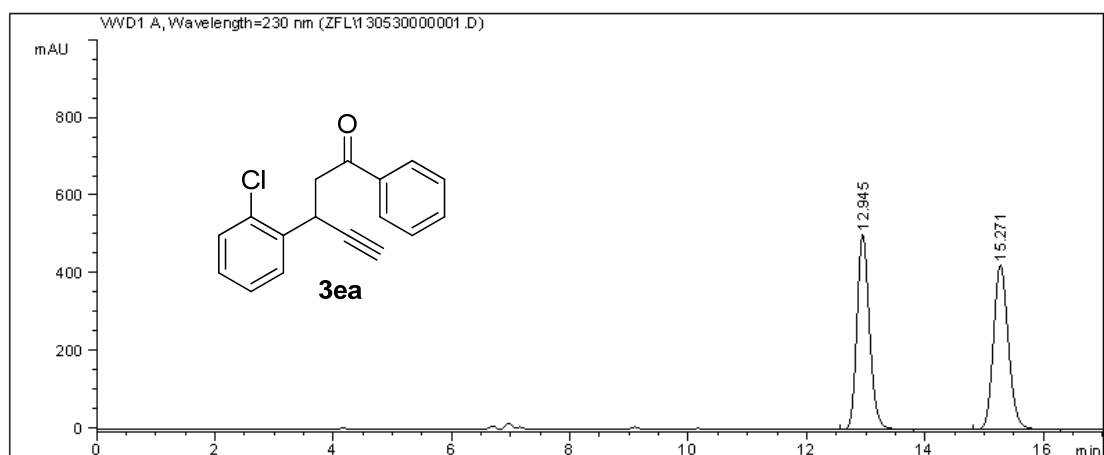

| # | Time   | Area   | Height | Width  | Area%  | Symmetry |
|---|--------|--------|--------|--------|--------|----------|
| 1 | 12.945 | 7405   | 502.4  | 0.2273 | 49.940 | 0.806    |
| 2 | 15.271 | 7422.7 | 423.8  | 0.2713 | 50.060 | 0.836    |

### HPLC chromatogram of chiral product 3ea

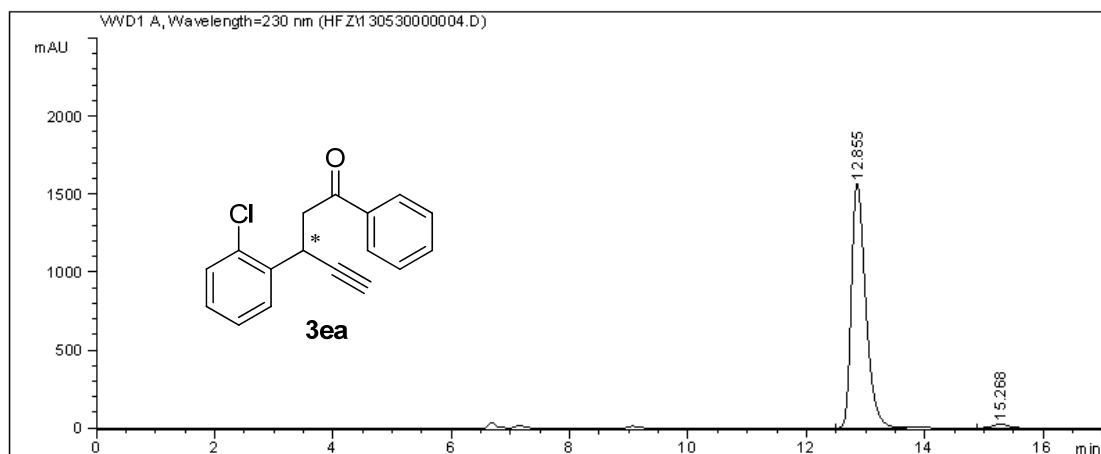

| # | Time   | Area    | Height | Width  | Area%  | Symmetry |
|---|--------|---------|--------|--------|--------|----------|
| 1 | 12.855 | 26271.9 | 1565.9 | 0.2569 | 98.300 | 0.632    |
| 2 | 15.268 | 454.2   | 25.2   | 0.2789 | 1.700  | 0.885    |



### HPLC chromatogram of racemic product 3fa

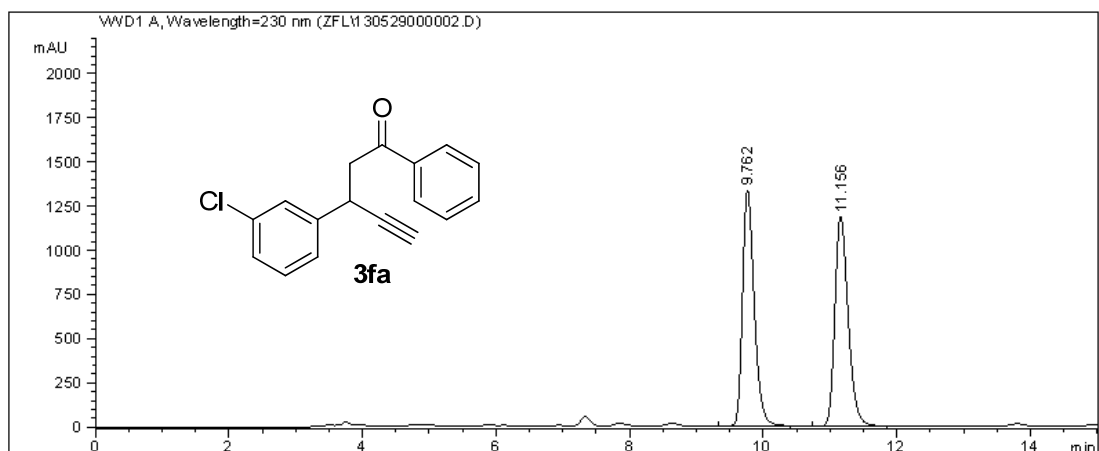

| # | Time   | Area    | Height | Width  | Area%  | Symmetry |
|---|--------|---------|--------|--------|--------|----------|
| 1 | 9.762  | 16529.1 | 1338.7 | 0.1892 | 49.905 | 0.683    |
| 2 | 11.156 | 16591.9 | 1189.9 | 0.2136 | 50.095 | 0.711    |

### HPLC chromatogram of chiral product 3fa

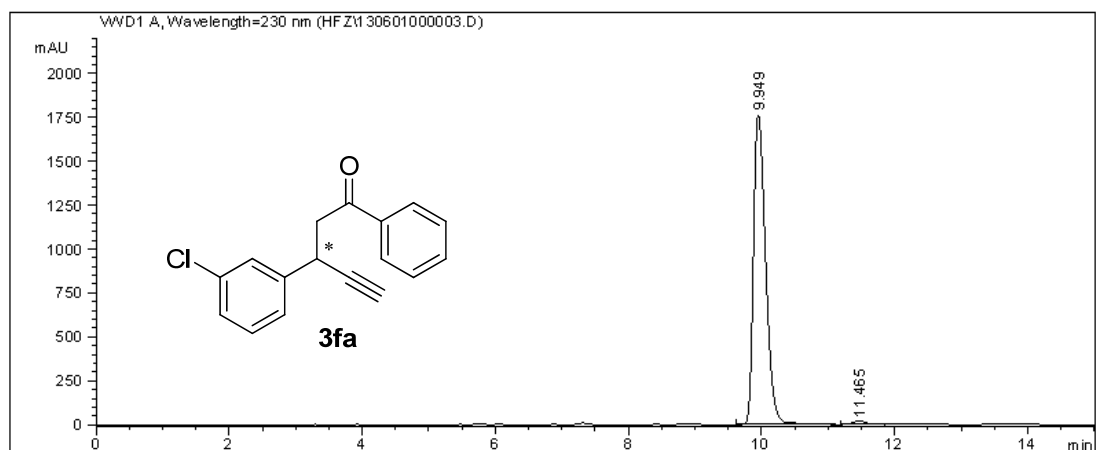

| # | Time   | Area  | Height | Width  | Area%  | Symmetry |
|---|--------|-------|--------|--------|--------|----------|
| 1 | 9.949  | 22333 | 1764   | 0.1972 | 98.845 | 0.607    |
| 2 | 11.465 | 261   | 20.5   | 0.1983 | 1.155  | 0.92     |

### HPLC chromatogram of racemic product 3ga

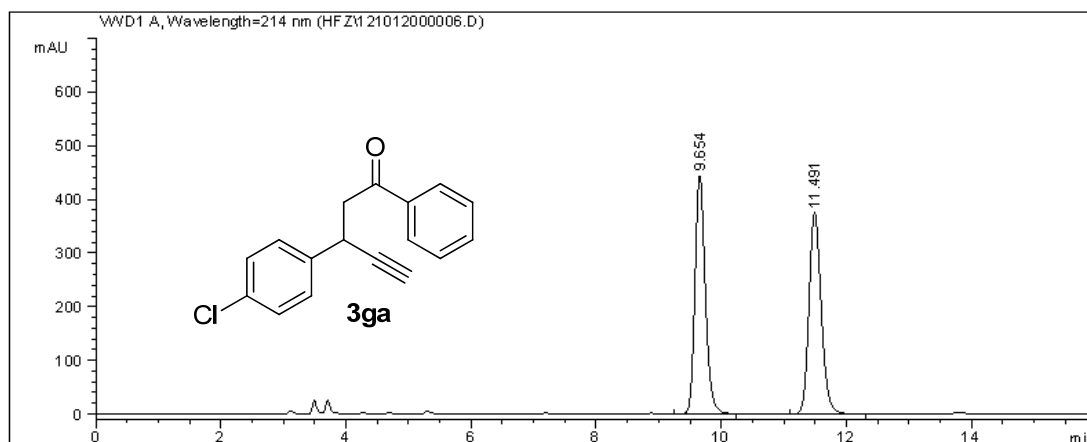

| # | Time   | Area   | Height | Width  | Area%  | Symmetry |
|---|--------|--------|--------|--------|--------|----------|
| 1 | 9.654  | 5114.9 | 444.5  | 0.1765 | 50.055 | 0.788    |
| 2 | 11.491 | 5103.7 | 374.7  | 0.2099 | 49.945 | 0.802    |

### HPLC chromatogram of chiral product 3ga

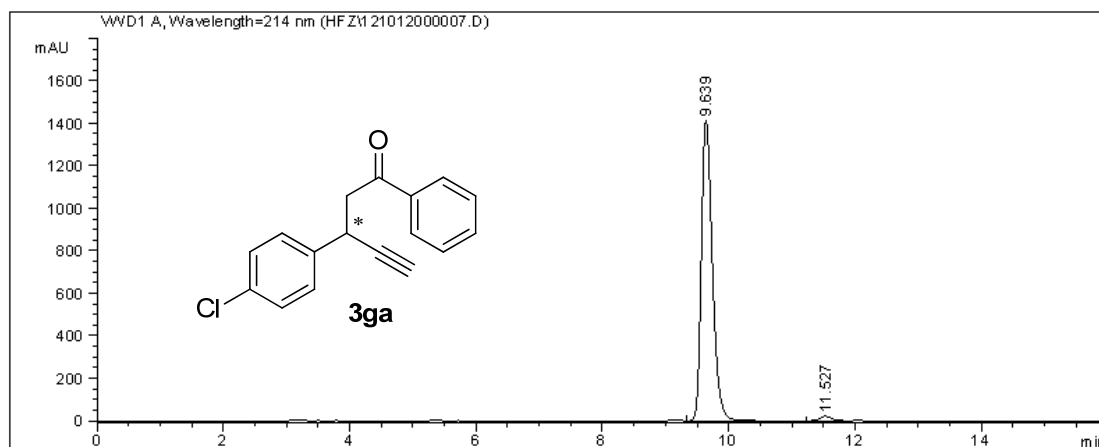

| # | Time   | Area    | Height | Width  | Area%  | Symmetry |
|---|--------|---------|--------|--------|--------|----------|
| 1 | 9.639  | 17134.2 | 1415.5 | 0.1864 | 98.427 | 0.671    |
| 2 | 11.527 | 273.9   | 20.7   | 0.2056 | 1.573  | 0.905    |

### HPLC chromatogram of racemic product 3ha

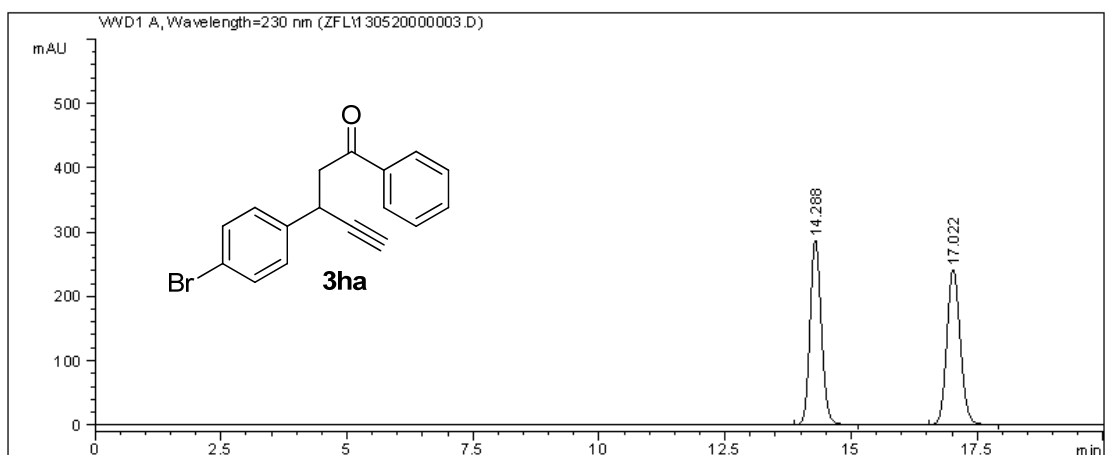

| # | Time   | Area   | Height | Width | Area%  | Symmetry |
|---|--------|--------|--------|-------|--------|----------|
| 1 | 14.288 | 4480.2 | 286.7  | 0.242 | 49.996 | 0.847    |
| 2 | 17.022 | 4481   | 241.3  | 0.288 | 50.004 | 0.858    |

### HPLC chromatogram of chiral product 3ha

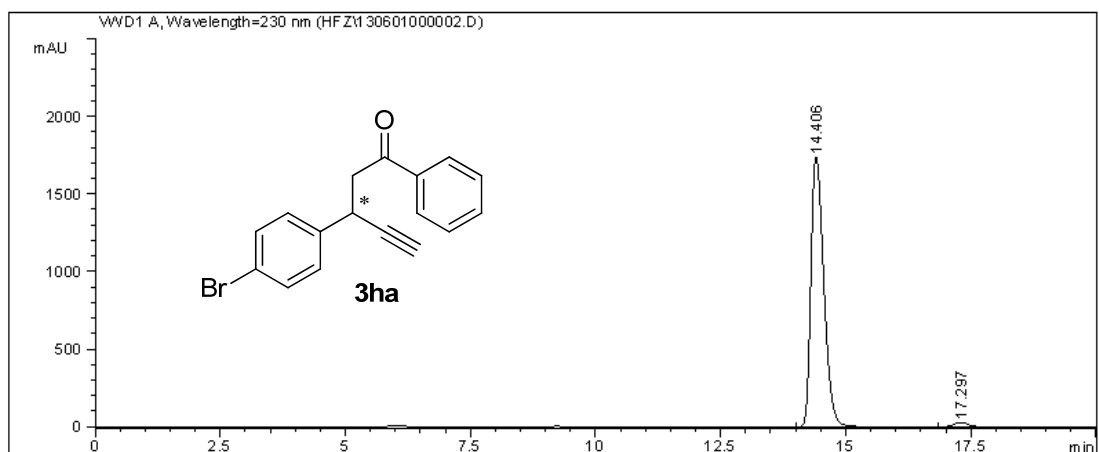

| # | Time   | Area    | Height | Width  | Area%  | Symmetry |
|---|--------|---------|--------|--------|--------|----------|
| 1 | 14.406 | 31029.5 | 1736.1 | 0.277  | 98.233 | 0.625    |
| 2 | 17.297 | 558.2   | 28.8   | 0.3002 | 1.767  | 0.881    |

### HPLC chromatogram of racemic product 3ia

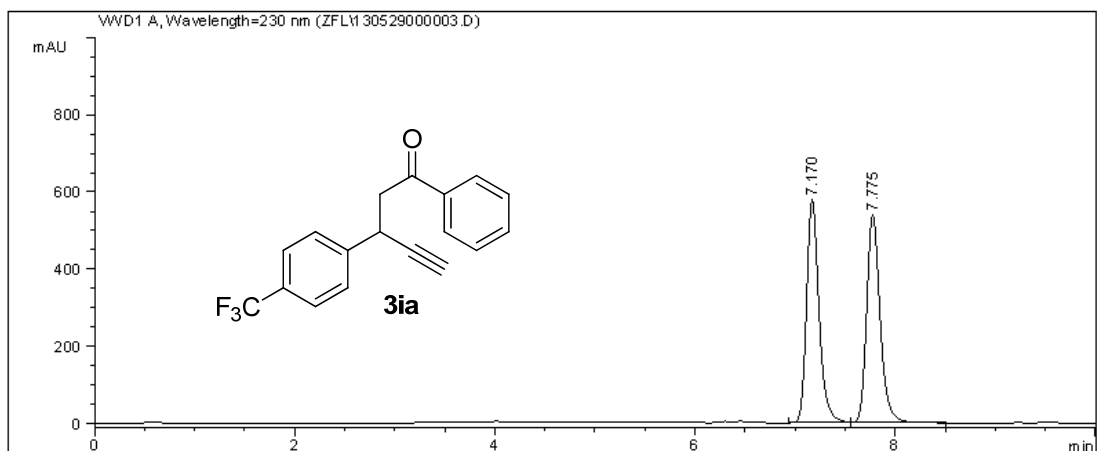

| # | Time  | Area   | Height | Width  | Area%  | Symmetry |
|---|-------|--------|--------|--------|--------|----------|
| 1 | 7.17  | 5001.8 | 578.1  | 0.1315 | 49.837 | 0.754    |
| 2 | 7.775 | 5034.5 | 539.1  | 0.1424 | 50.163 | 0.769    |

### HPLC chromatogram of chiral product 3ia

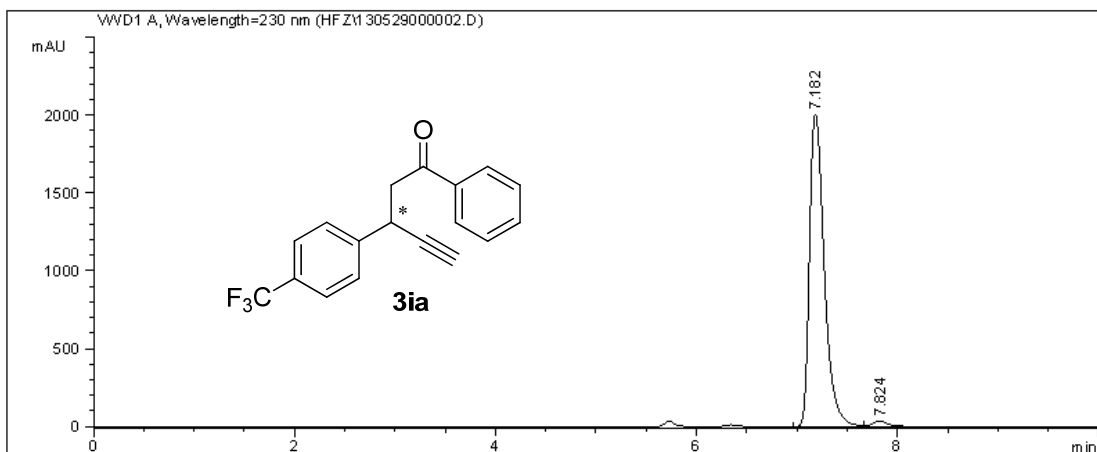

| # | Time  | Area    | Height | Width  | Area%  | Symmetry |
|---|-------|---------|--------|--------|--------|----------|
| 1 | 7.182 | 20471.4 | 2004.5 | 0.157  | 98.100 | 0.607    |
| 2 | 7.824 | 396.4   | 37.9   | 0.1555 | 1.900  | 0.809    |

### HPLC chromatogram of racemic product 3ja

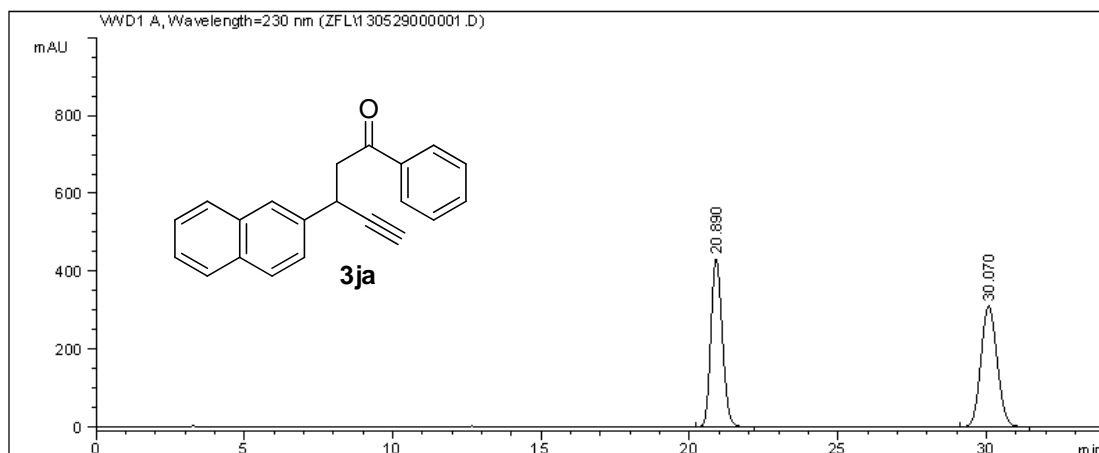

| # | Time  | Area    | Height | Width  | Area%  | Symmetry |
|---|-------|---------|--------|--------|--------|----------|
| 1 | 20.89 | 11573.5 | 432.5  | 0.4185 | 49.457 | 0.807    |
| 2 | 30.07 | 11827.7 | 310.4  | 0.596  | 50.543 | 0.876    |

### HPLC chromatogram of chiral product 3ja

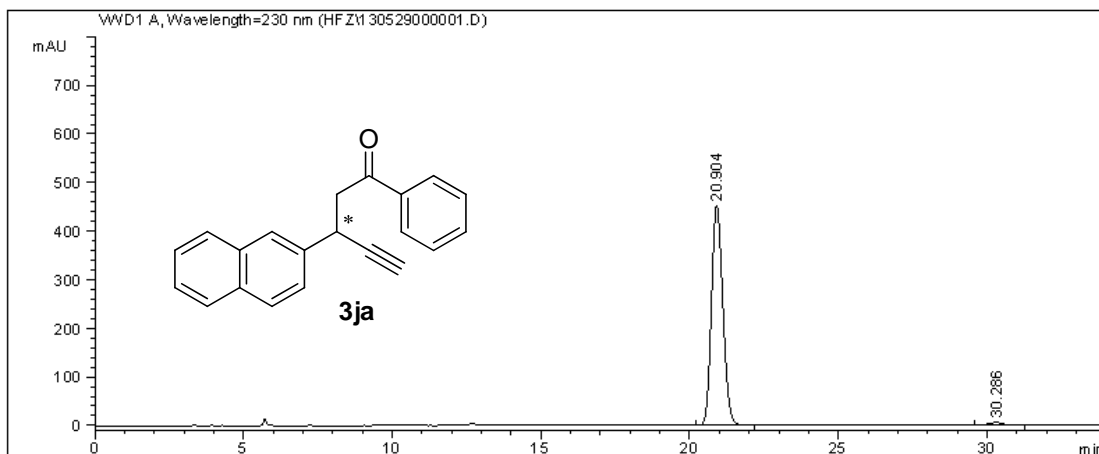

| # | Time   | Area    | Height | Width  | Area%  | Symmetry |
|---|--------|---------|--------|--------|--------|----------|
| 1 | 20.904 | 12060.5 | 452.2  | 0.4146 | 98.242 | 0.804    |
| 2 | 30.286 | 215.8   | 5.9    | 0.5625 | 1.758  | 0.966    |

### HPLC chromatogram of racemic product 3ka

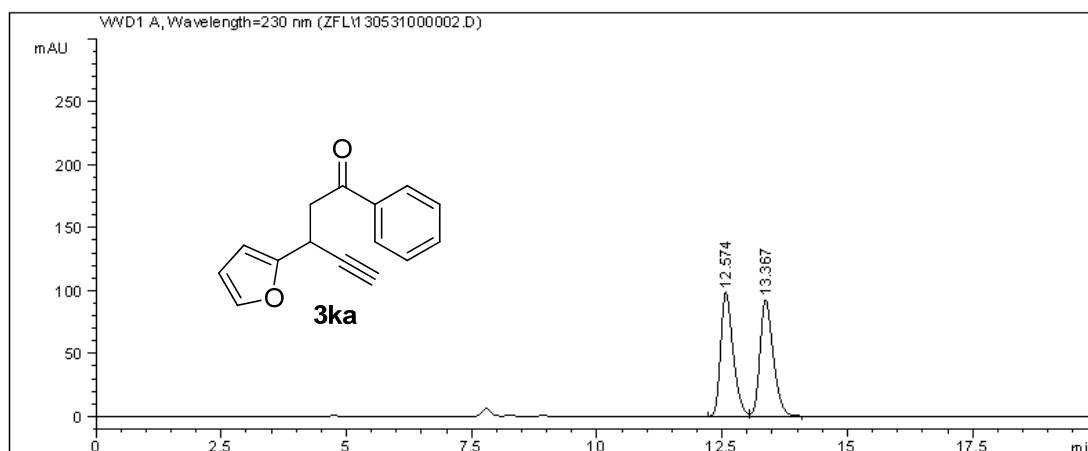

| # | Time   | Area   | Height | Width  | Area%  | Symmetry |
|---|--------|--------|--------|--------|--------|----------|
| 1 | 12.574 | 1700.2 | 98.3   | 0.263  | 49.890 | 0.69     |
| 2 | 13.367 | 1707.7 | 92.5   | 0.2795 | 50.110 | 0.709    |

### HPLC chromatogram of chiral product 3ka

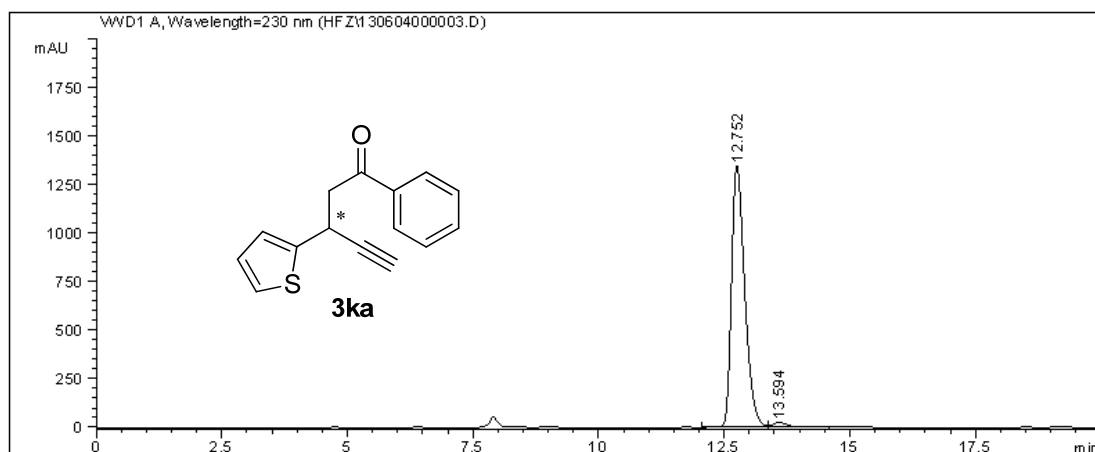

| # | Time   | Area    | Height | Width  | Area%  | Symmetry |
|---|--------|---------|--------|--------|--------|----------|
| 1 | 12.752 | 24577.9 | 1346.1 | 0.2785 | 97.953 | 0.64     |
| 2 | 13.594 | 513.6   | 24.6   | 0.3079 | 2.047  | 0.693    |

### HPLC chromatogram of racemic product 3ab

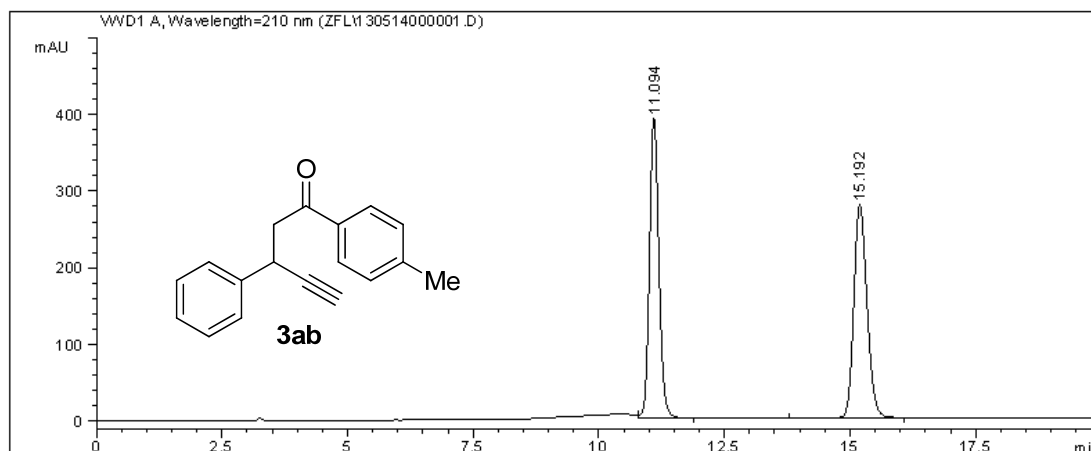

| # | Time   | Area   | Height | Width  | Area%  | Symmetry |
|---|--------|--------|--------|--------|--------|----------|
| 1 | 11.094 | 5120.4 | 392    | 0.2004 | 50.152 | 0.84     |
| 2 | 15.192 | 5089.3 | 278.3  | 0.2818 | 49.848 | 0.794    |

### HPLC chromatogram of chiral product 3ab

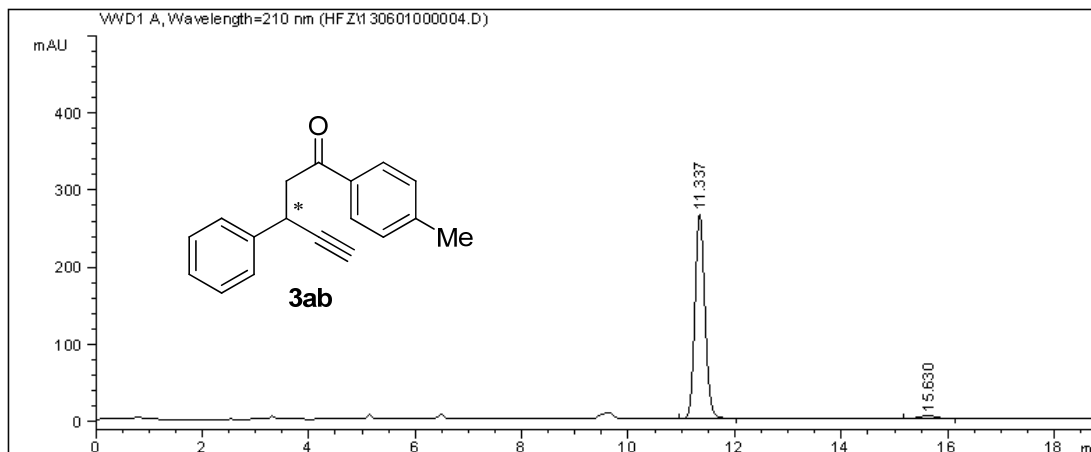

| # | Time   | Area   | Height | Width  | Area%  | Symmetry |
|---|--------|--------|--------|--------|--------|----------|
| 1 | 11.337 | 3449.9 | 264.9  | 0.2029 | 97.958 | 0.851    |
| 2 | 15.63  | 71.9   | 3.7    | 0.2995 | 2.042  | 1.045    |

### HPLC chromatogram of racemic product 3ac

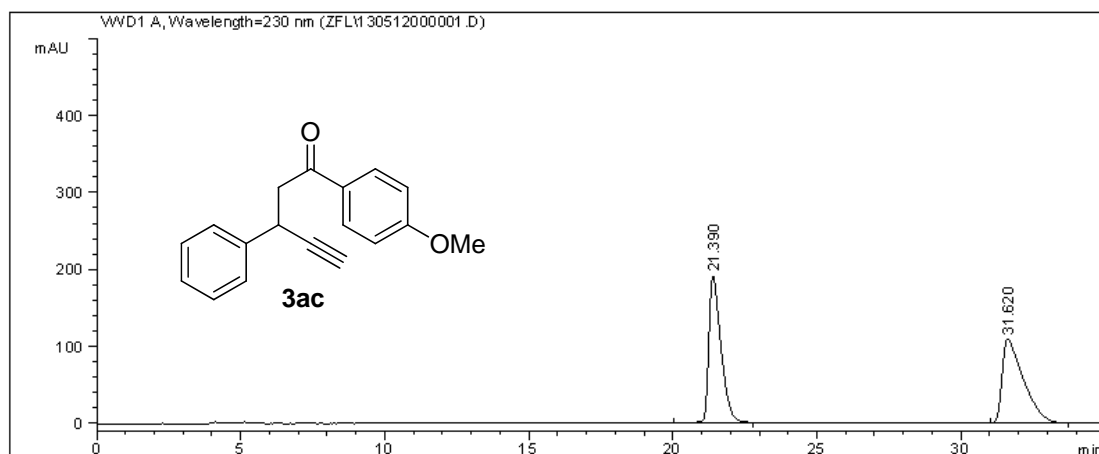

| # | Time  | Area   | Height | Width  | Area%  | Symmetry |
|---|-------|--------|--------|--------|--------|----------|
| 1 | 21.39 | 5569.6 | 190.5  | 0.4401 | 49.959 | 0.492    |
| 2 | 31.62 | 5578.7 | 108.8  | 0.7251 | 50.041 | 0.334    |

### HPLC chromatogram of chiral product 3ac

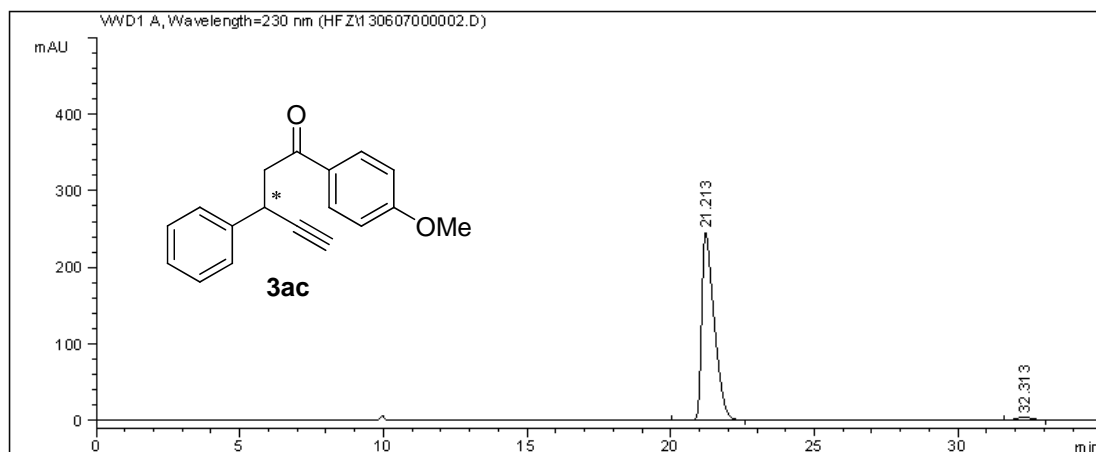

| # | Time   | Area   | Height | Width  | Area%  | Symmetry |
|---|--------|--------|--------|--------|--------|----------|
| 1 | 21.213 | 7416.2 | 245.1  | 0.4535 | 98.046 | 0.438    |
| 2 | 32.313 | 147.8  | 3.9    | 0.5612 | 1.954  | 0.893    |



### HPLC chromatogram of racemic product 3ad

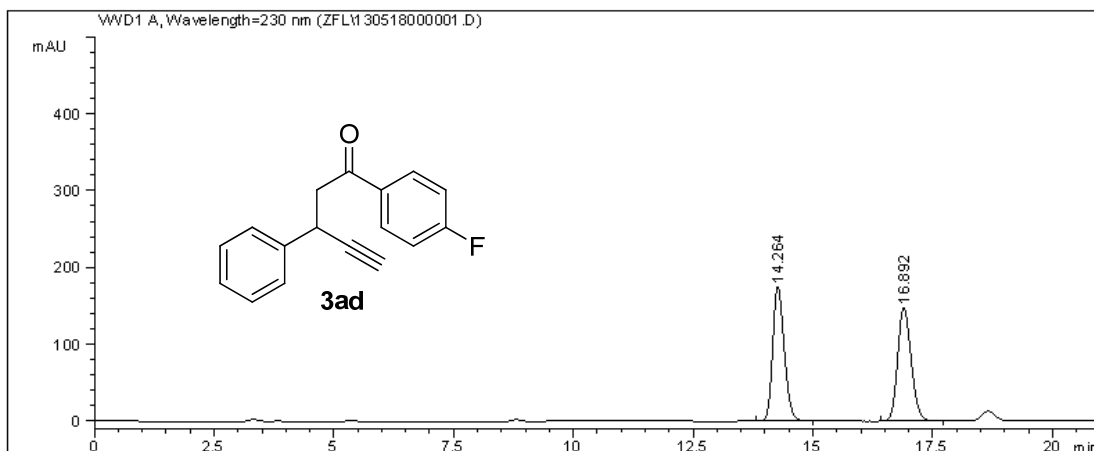

| # | Time   | Area   | Height | Width  | Area%  | Symmetry |
|---|--------|--------|--------|--------|--------|----------|
| 1 | 14.264 | 2933.8 | 174.8  | 0.2599 | 50.183 | 0.748    |
| 2 | 16.892 | 2912.4 | 148    | 0.3053 | 49.817 | 0.787    |

### HPLC chromatogram of chiral product 3ad

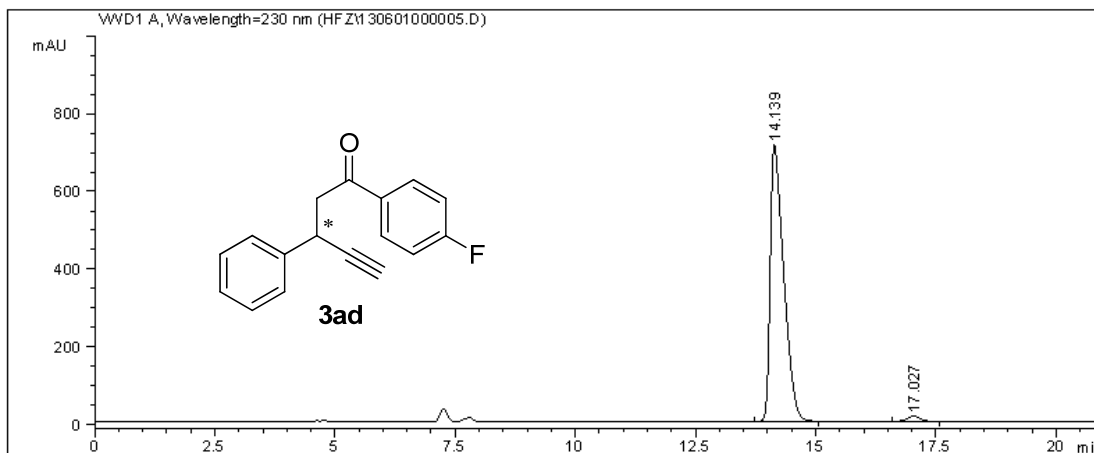

| # | Time   | Area    | Height | Width  | Area%  | Symmetry |
|---|--------|---------|--------|--------|--------|----------|
| 1 | 14.139 | 13889.7 | 712.2  | 0.2916 | 98.162 | 0.424    |
| 2 | 17.027 | 260.1   | 13.5   | 0.2993 | 1.838  | 0.939    |

### HPLC chromatogram of racemic product 3ae

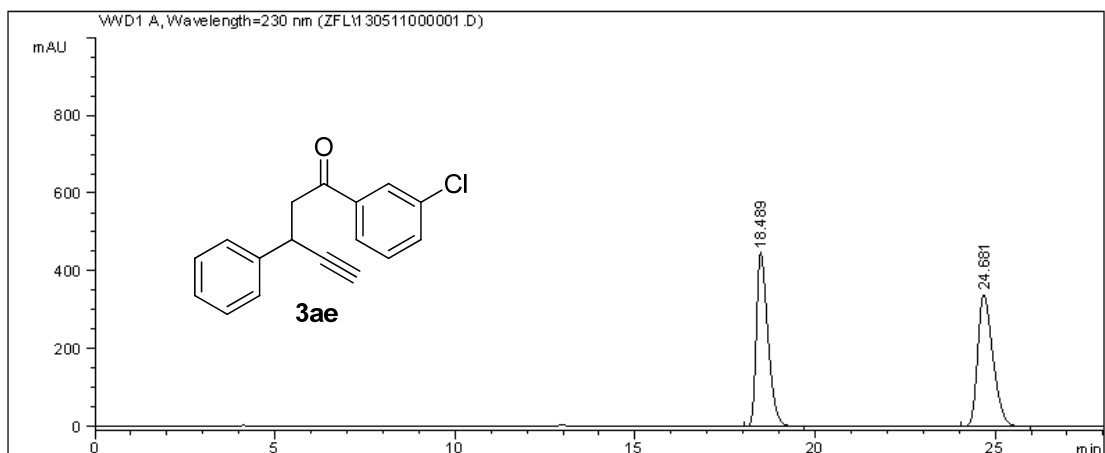

| # | Time   | Area    | Height | Width  | Area%  | Symmetry |
|---|--------|---------|--------|--------|--------|----------|
| 1 | 18.489 | 10006.4 | 447.1  | 0.3383 | 49.936 | 0.58     |
| 2 | 24.681 | 10032.2 | 340.1  | 0.449  | 50.064 | 0.636    |

### HPLC chromatogram of chiral product 3ae

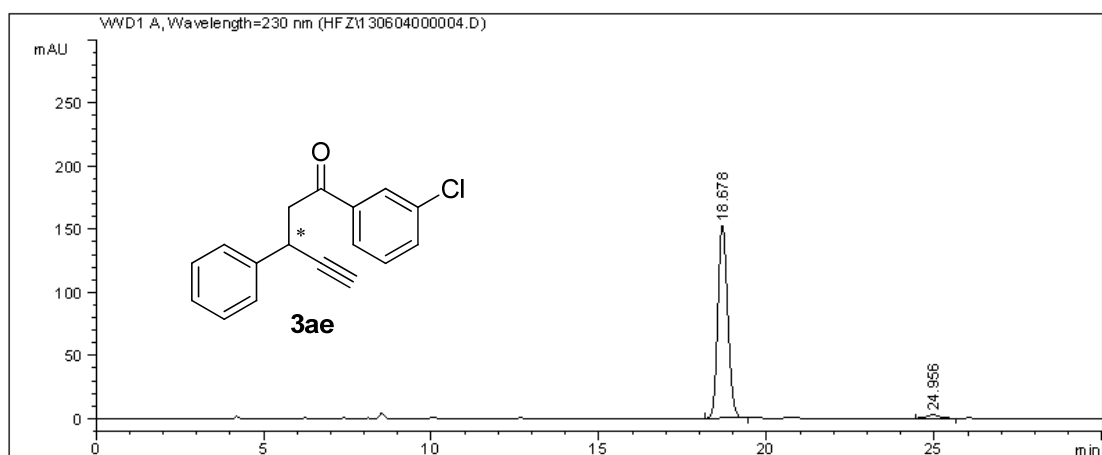

| # | Time   | Area   | Height | Width  | Area%  | Symmetry |
|---|--------|--------|--------|--------|--------|----------|
| 1 | 18.678 | 3128.4 | 153.3  | 0.3167 | 97.947 | 0.807    |
| 2 | 24.956 | 65.6   | 2.4    | 0.3754 | 2.053  | 0.964    |

### HPLC chromatogram of racemic product 3af

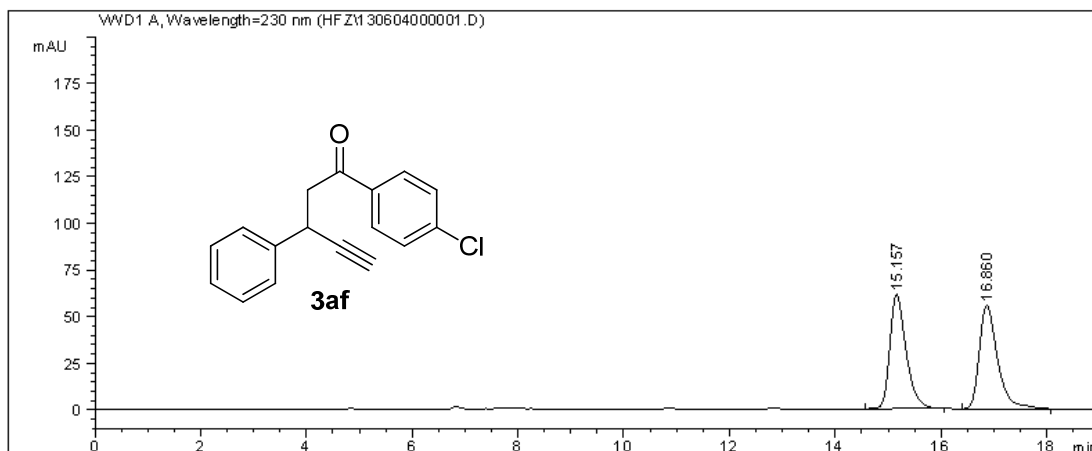

| # | Time   | Area   | Height | Width  | Area%  | Symmetry |
|---|--------|--------|--------|--------|--------|----------|
| 1 | 15.157 | 1312.8 | 61.3   | 0.3243 | 49.735 | 0.672    |
| 2 | 16.86  | 1326.8 | 55.5   | 0.3604 | 50.265 | 0.639    |

### HPLC chromatogram of chiral product 3af

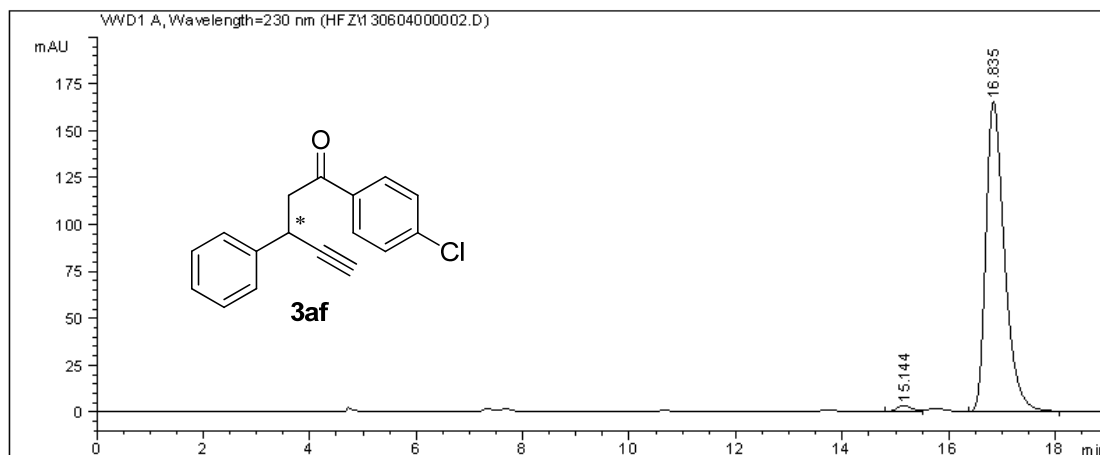

| # | Time   | Area   | Height | Width  | Area%  | Symmetry |
|---|--------|--------|--------|--------|--------|----------|
| 1 | 15.144 | 64.2   | 3.2    | 0.3032 | 1.577  | 0.732    |
| 2 | 16.835 | 4009.2 | 165.3  | 0.3689 | 98.423 | 0.644    |

### HPLC chromatogram of racemic product 3ag

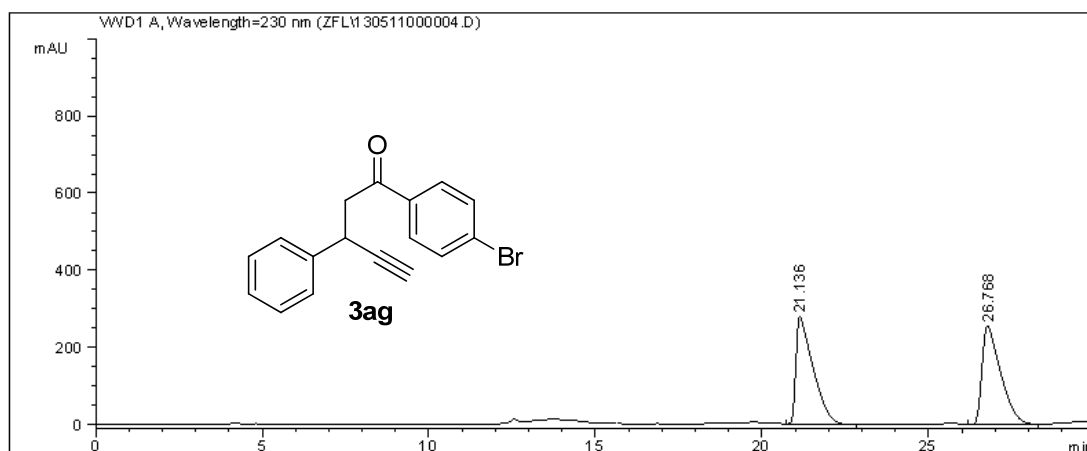

| # | Time   | Area   | Height | Width  | Area%  | Symmetry |
|---|--------|--------|--------|--------|--------|----------|
| 1 | 21.136 | 9977.9 | 279    | 0.5162 | 50.109 | 0.288    |
| 2 | 26.768 | 9934.6 | 255.6  | 0.5685 | 49.891 | 0.399    |

### HPLC chromatogram of chiral product 3ag

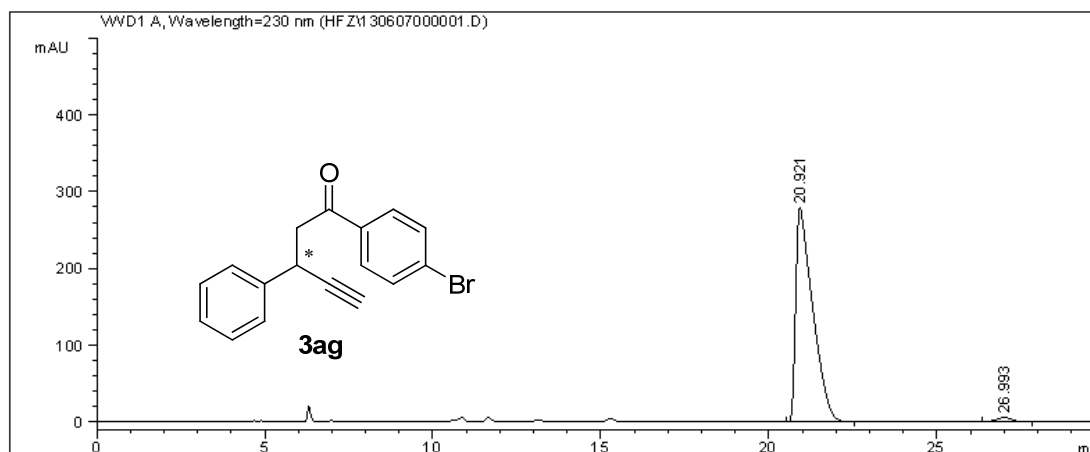

| # | Time   | Area  | Height | Width  | Area%  | Symmetry |
|---|--------|-------|--------|--------|--------|----------|
| 1 | 20.921 | 9771  | 278.4  | 0.5099 | 98.193 | 0.309    |
| 2 | 26.993 | 179.8 | 5.6    | 0.4862 | 1.807  | 0.969    |
